# 1 Distinct Synaptic Transfer Functions in Same-Type Photoreceptors

2

3 Cornelius Schröder<sup>1,2§</sup>, Jonathan Oesterle<sup>1,2</sup>, Philipp Berens<sup>1,2,3\*</sup>, Takeshi Yoshimatsu<sup>4\*</sup>, Tom  
4 Baden<sup>1,4\*§</sup>

5 **SUMMARY.** Many sensory systems use ribbon-type synapses to transmit their signals to  
6 downstream circuits. The properties of this synaptic transfer fundamentally dictate which  
7 aspects in the original stimulus will be accentuated or suppressed, thereby partially defining  
8 the detection limits of the circuit. Accordingly, sensory neurons have evolved a wide variety of  
9 ribbon geometries and vesicle pool properties to best support their diverse functional  
10 requirements. However, the need for diverse synaptic functions does not only arise across  
11 neuron types, but also *within*. Here we show that UV-cones, a single type of photoreceptor of  
12 the larval zebrafish eye, exhibit striking differences in their synaptic ultrastructure and  
13 consequent calcium to glutamate transfer function depending on their location in the eye. We  
14 arrive at this conclusion by combining serial section electron microscopy and simultaneous  
15 “dual-colour” 2-photon imaging of calcium and glutamate signals from the same synapse *in*  
16 *vivo*. We further use the functional dataset to fit a cascade-like model of the ribbon synapse  
17 with different vesicle pool sizes, transfer rates and other synaptic properties. Exploiting recent  
18 developments in simulation-based inference, we obtain full posterior estimates for the  
19 parameters and compare these across different retinal regions. The model enables us to  
20 extrapolate to new stimuli and to systematically investigate different response behaviours of  
21 various ribbon configurations. We also provide an interactive, easy-to-use version of this  
22 model as an online tool. Overall, we show that already on the synaptic level of single neuron  
23 types there exist highly specialized mechanisms which are advantageous for the encoding of  
24 different visual features.

25

---

26 1: Institute for Ophthalmic Research, University of Tübingen, Germany; 2: Center for Integrative Neuroscience,  
27 University of Tübingen, Germany; 3: Bernstein Center for Computational Neuroscience, Centre for Integrative  
28 Neuroscience, all: University of Tübingen, Germany; 4: School of Life Sciences, University of Sussex, UK; \**equally*  
29 *contributing senior authors*; §*Correspondence: cornelius.schroeder@uni-tuebingen.de; t.baden@sussex.ac.uk.*

30 **ACKNOWLEDGEMENTS.** The authors thank Leon Lagnado for critical feedback on the manuscript, and Kit  
31 Longden for valuable discussions. Funding was provided by the European Research Council (ERC-StG  
32 “NeuroVisEco” 677687 to TB), The Wellcome Trust (Investigator Award in Science 220277/Z/20/Z to TB), The UKRI  
33 (BBSRC, BB/R014817/1 to TB), the German Ministry for Education and Research (01GQ1601, 01IS18052C,  
34 01IS18039A to PB), the German Research Foundation (BE5601/4-1, EXC 2064 – 390727645 to PB), the  
35 Leverhulme Trust (PLP-2017-005 to TB), the Lister Institute for Preventive Medicine (to TB). Marie Curie  
36 Sklodowska Actions individual fellowship (“ColourFish” 748716 to TY) from the European Union’s Horizon 2020  
37 research and innovation programme. The authors also thank the FENS-KAVLI Network of Excellence, and the  
38 EMBO YIP.

39 **AUTHOR CONTRIBUTIONS.** The manuscript was conceptualised and developed by CS, TY, TB and PB. CS  
40 established the models and together with JO adapted the inference method. TY performed electron microscopy  
41 and two-photon imaging, pre-processing of the data and generated transgenic lines, with support from TB. CS  
42 performed additional analyses and statistical testing, with help from PB. TB and PB supervised the project. The  
43 manuscript was written by CS and TB with input from TY and PB. Funding was acquired by TB, PB and TY.

44 **DECLARATION OF INTERESTS.** The authors declare no competing interests.

45

## INTRODUCTION

46

47

48

49

50

51

52

53

54

55

56

57

58

59

60

61

62

63

64

65

66

67

68

69

Ribbon-type synapses feed high-bandwidth sensory signals into their postsynaptic networks (reviewed in e.g. (Moser et al., 2019; Sterling and Matthews, 2005)). However, depending on the species, modality, or receptor type the nature of this synaptic transfer can differ greatly. For example, auditory systems typically operate at higher frequencies than visual systems, and accordingly auditory inner hair cells tend to use “faster” ribbon synapses compared to those of photoreceptors (Baden et al., 2013a; Moser et al., 2019). Moreover, amongst photoreceptors of the vertebrate eye, rods and cones tend to differ greatly in the way they use their ribbons (Regus-Leidig and Brandstätter, 2012; Sterling and Matthews, 2005). Rods generally have large ribbons that can dock many hundreds of vesicles at a time, concentrated at a single release site, to support focussed, low-noise transmission (e.g. (Hays et al., 2021)). In contrast, cones usually use multiple smaller ribbons, often positioned at different release sites in a single pedicle, to serve diverse postsynaptic circuits (e.g. (DeVries et al., 2006; Jackman et al., 2009)). The ribbon synapses in electrosensory organs of elasmobranchs take such ribbon tuning to the extreme (Bellono et al., 2018). For example, sharks achieve high-amplitude pulsatile transmission required for predation by combining greatly elongated ribbons with an ion-channel composition that supports broad spiking. In contrast, skates drive their smaller ribbons using graded voltage signals to support low-amplitude, oscillatory transmission suitable for intraspecific communication. This suggests that ribbons and their associated molecular machinery are important structural tuning sites of synaptic function in many sensory systems.

70

71

72

73

74

75

76

77

78

However, the functional requirements of synaptic transmission do not only differ across neuron types, but also *within* (Baden et al., 2013b; Franceschini et al., 1981; Sinha et al., 2017; Szatko et al., 2019; Yoshimatsu et al., 2020b; Zimmermann et al., 2018). For example, in vision, different parts of the eye survey different parts of visual space, often with distinct distribution of light and visuo-ecological significance (reviewed in (Baden et al., 2020; Land and Nilsson, 2012)). Correspondingly, we hypothesised that within-type functional tuning of a sensory receptor neuron should also utilise the vast tuning potential of its ribbon.

79

80

81

82

83

84

85

86

87

88

89

90

We explored this idea in the model of larval zebrafish UV-cone photoreceptors, which exhibit profound structural, molecular and circuit differences depending on their location in the eye (Yoshimatsu et al., 2020b). First, UV-cone density varies across retinal regions and peak in the acute zone (AZ), and to a lesser extent also nasally (Yoshimatsu et al., 2020b; Zimmermann et al., 2018). Furthermore, UV-cones in the AZ combine an enlarged outer segment with molecular tuning of the phototransduction cascade, an elevated calcium baseline and strong feedback from horizontal cells to boost detection brighter-than-background stimuli. This likely supports visual prey capture of UV-bright water-borne micro-organisms such as paramecia. In contrast, UV-cones in other parts of the eye preferentially respond to darker-than-background stimuli, which may serve silhouette

91 detection of nearby objects against the backdrop of bright UV-scatter from  
92 the sun. Amongst themselves, non-AZ UV cones further differ in additional  
93 aspects, including their absolute light sensitivity. Building on these earlier  
94 results, we here asked if and how the actual synaptic transfer differs amongst  
95 UV-cones across the eye.

96 First, we used electron microscopy to reveal eye-region specific structural  
97 differences amongst UV-cone ribbons and their presynaptic distribution of  
98 vesicles. Next, we found kinetic differences in synaptic transfer using *in-vivo*  
99 simultaneous dual-colour 2-photon imaging of the same pedicles' presynaptic  
100 calcium and resultant release. We then tied these findings together in a biophysical  
101 model, which enables computationally exploring possible underlying biological  
102 mechanisms and sites of tuning within the release cascade. Finally, we generalised  
103 our findings into an online model of synaptic transfer from the ribbon that enables  
104 free control over all key parameters, including ribbon dimensions, their dynamics,  
105 and the behaviour of underlying calcium drive (available online at  
106 <http://www.tinyurl.com/h3av1ga>).  
107

108

109

## RESULTS

110 **UV-cone ribbon geometry and vesicle distributions differ with eye**  
111 **position.** To establish possible structural differences amongst larval  
112 zebrafish UV-cone ribbon synapses, we obtained volumetric electron  
113 microscopy datasets of the outer retina taken from three different regions:  
114 Acute zone (AZ), Nasal (N) and Dorsal (D). For each region, we anatomically  
115 identified (Yoshimatsu et al., 2020a) and 3D-reconstructed UV-cone  
116 pedicles ( $n_{AZ, N, D} = 6, 6, 6$ ) including their full complement of ribbons and  
117 surrounding vesicles (Fig. 1a-c, Methods). This revealed that dorsal ribbons  
118 were smaller (Fig. 1d,e) and less numerous (Fig. 1f) compared to AZ or nasal  
119 ones. However, nasal UV-cones had the lowest vesicle density immediately  
120 adjacent to the ribbon (Fig. 1g,h, Fig. S1). In addition, further away from the  
121 ribbon, the vesicle density was lowest in dorsal UV-cones, and highest in AZ  
122 UV-cones (Fig. 1h, Fig. S1). Although it is possible that the experimental  
123 procedure distorted the vesicle distribution slightly, it is unlikely that this  
124 effect is disproportionately prominent in one eye region compared to the  
125 others. Taken together, the overall complement between ribbon number,  
126 geometry and vesicle distributions therefore markedly differed across the  
127 three regions of the eye (Fig. 1i). We next asked if and how these structural  
128 differences may translate into differences in synaptic function.

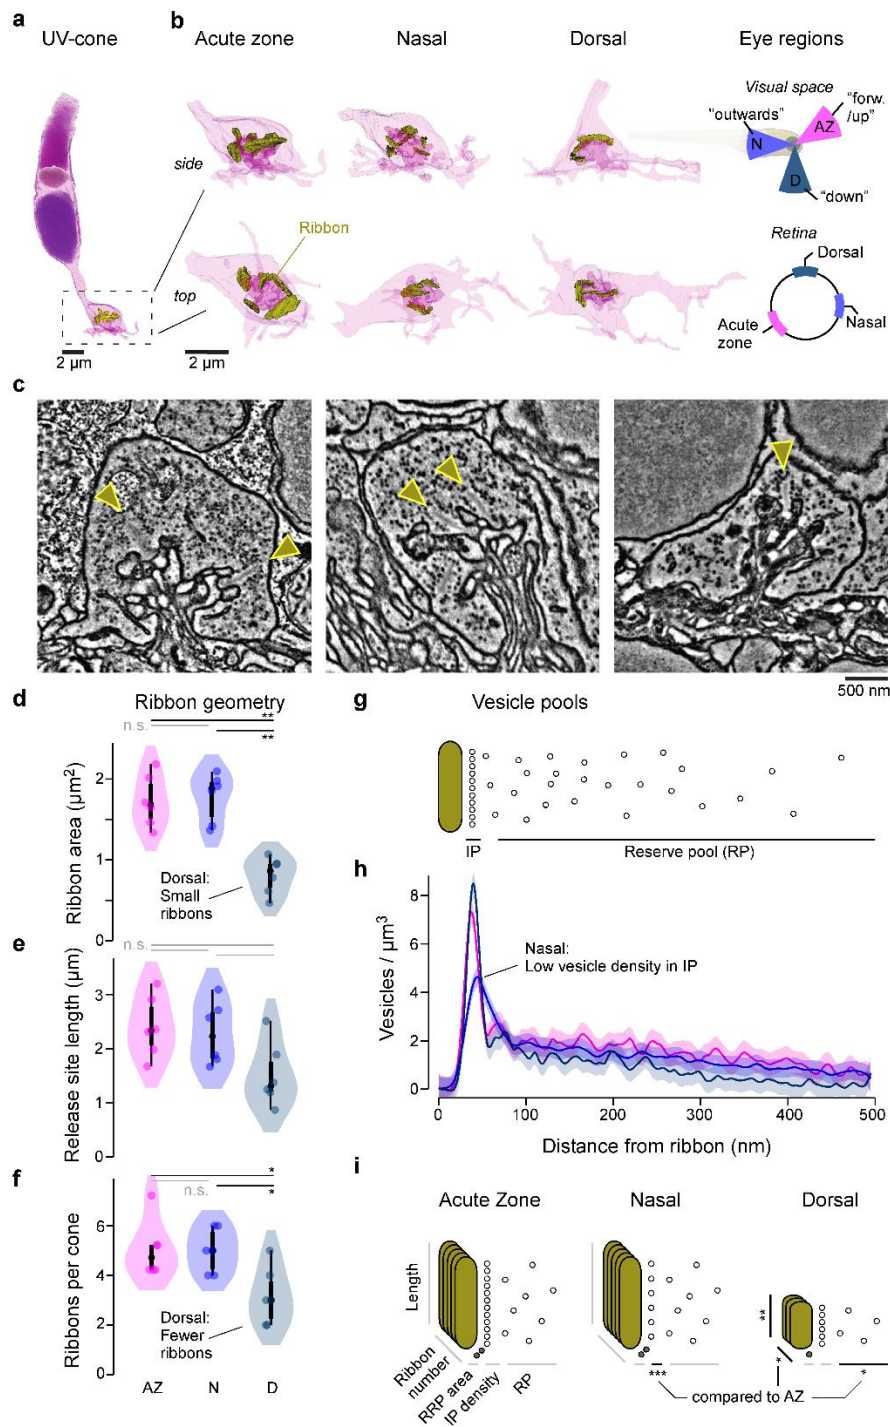

129

130 **Figure 1. Eye-region-specific structural tuning of a ribbon synapse in UV-cones.** **a**, Example of a full UV-cone  
 131 reconstruction, taken from the acute zone. Dark purple: nucleus, light-purple: mitochondria, purple: outer segment,  
 132 yellow: ribbon. **b**, Zoom-ins of UV-cone terminals from different regions, which are illustrated on the rightmost  
 133 panels. Ribbons are highlighted in yellow. Each terminal is shown from the side (top) and from below (bottom). **c**,  
 134 Example electron-microscopy images from each zone, with arrowheads indicating ribbons. **d,e,f** Violin plots of the  
 135 ribbon geometry and number for the three different regions (two-sided shuffling test with Bonferroni correction,  $n_{AZ}$ ,  
 136  $n_N$ ,  $n_D = 6, 6, 6$ , \*  $p < 0.05$ , \*\*  $p < 0.01$ ). **g**, Two-dimensional schema of the vesicle pools at a ribbon synapse. **h**,  
 137 Mean and 95% confidence intervals for vesicle densities as a function of distance to the ribbon. Predictions are  
 138 made from a Generalized Additive Model (GAM, Methods), (see Fig. S1 for statistical comparisons). **i**, Summary  
 139 schema of observed EM-level differences between UV-cones at the level of ribbon geometry, number, and vesicle  
 140 distributions. Asterisks indicate significant differences compared to AZ. The stacked ribbons (gold) indicate the  
 141 ribbon number per cone, whereas the vesicles (small circles) are exemplified in a two-dimensional plane for a single  
 142 ribbon.



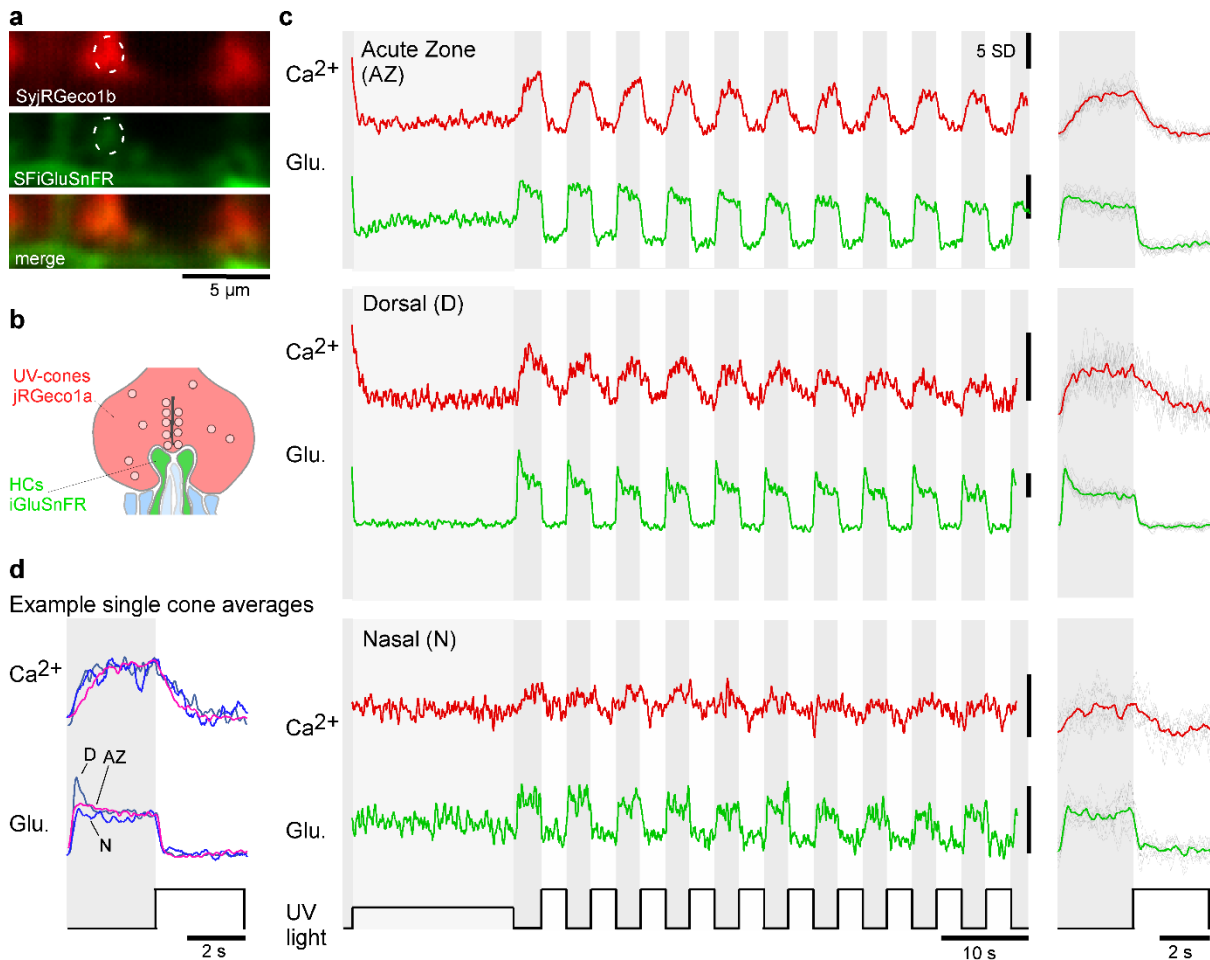

143

144 **Figure 2. Simultaneous *in vivo* imaging of synaptic calcium and release.** **a,b** Simultaneously acquired two-  
 145 photon scans of cone terminals and opposing horizontal cell dendrites, with cone-pedicles expressing *SyjRGeco1b*  
 146 (red), and horizontal cell dendrites expressing *SFiGluSnFR* (green), and schematic representation, showing the  
 147 cone-pedicle (red) with ribbon and vesicles, as well as horizontal cell processes (green) and bipolar cell dendrites  
 148 (blue). **c**, Examples of raw calcium (red) and glutamate (green) traces recorded simultaneously from single UV-  
 149 cones, one from each eye region as indicated. The averaged traces, and superimposed stimulus repetitions are  
 150 shown on the right **d**, Overlay of the averaged traces in (c), highlighting different glutamate responses despite very  
 151 similar calcium responses.

152

153 **Eye-region dependent differences in UV-cone release kinetics.** To  
 154 simultaneously monitor presynaptic calcium and resultant glutamate release  
 155 from single UV-cone pedicles *in vivo*, we expressed the “green” fluorescent  
 156 glutamate biosensor *SFiGluSnFR* in horizontal cells postsynaptic to the  
 157 cones, and the “red” calcium biosensor *SyjRGeco1b* in all-cones (Fig. 2a,b,  
 158 Methods). Biosensor expression appeared to be uniform across the eye, in  
 159 line with previous work (Yoshimatsu et al., 2020b). Furthermore, there was  
 160 no obvious spectral mixing of the two fluorescence channels (SFig. 2a,b).  
 161 UV-cones were unambiguously identified based on their robust responses  
 162 only to UV-light (Methods, (Yoshimatsu et al., 2020a)). We then concurrently  
 163 recorded red and green fluorescence signals under two-photon during  
 164 presentation of 100% contrast widefield flashes of UV-light (3 s On, 3 s Off),  
 165 starting from a 50% contrast background (Fig. 2c, Methods). In example  
 166 recordings from each eye region, this revealed very different glutamate  
 signals during light offsets, despite similar appearing calcium signals (Fig.

167  
168  
169

2c). When scaled to their common sustained component, the dorsal cone was much more transient compared to the nasal cone, with a kinetically intermediate AZ-cone (Fig. 2d).

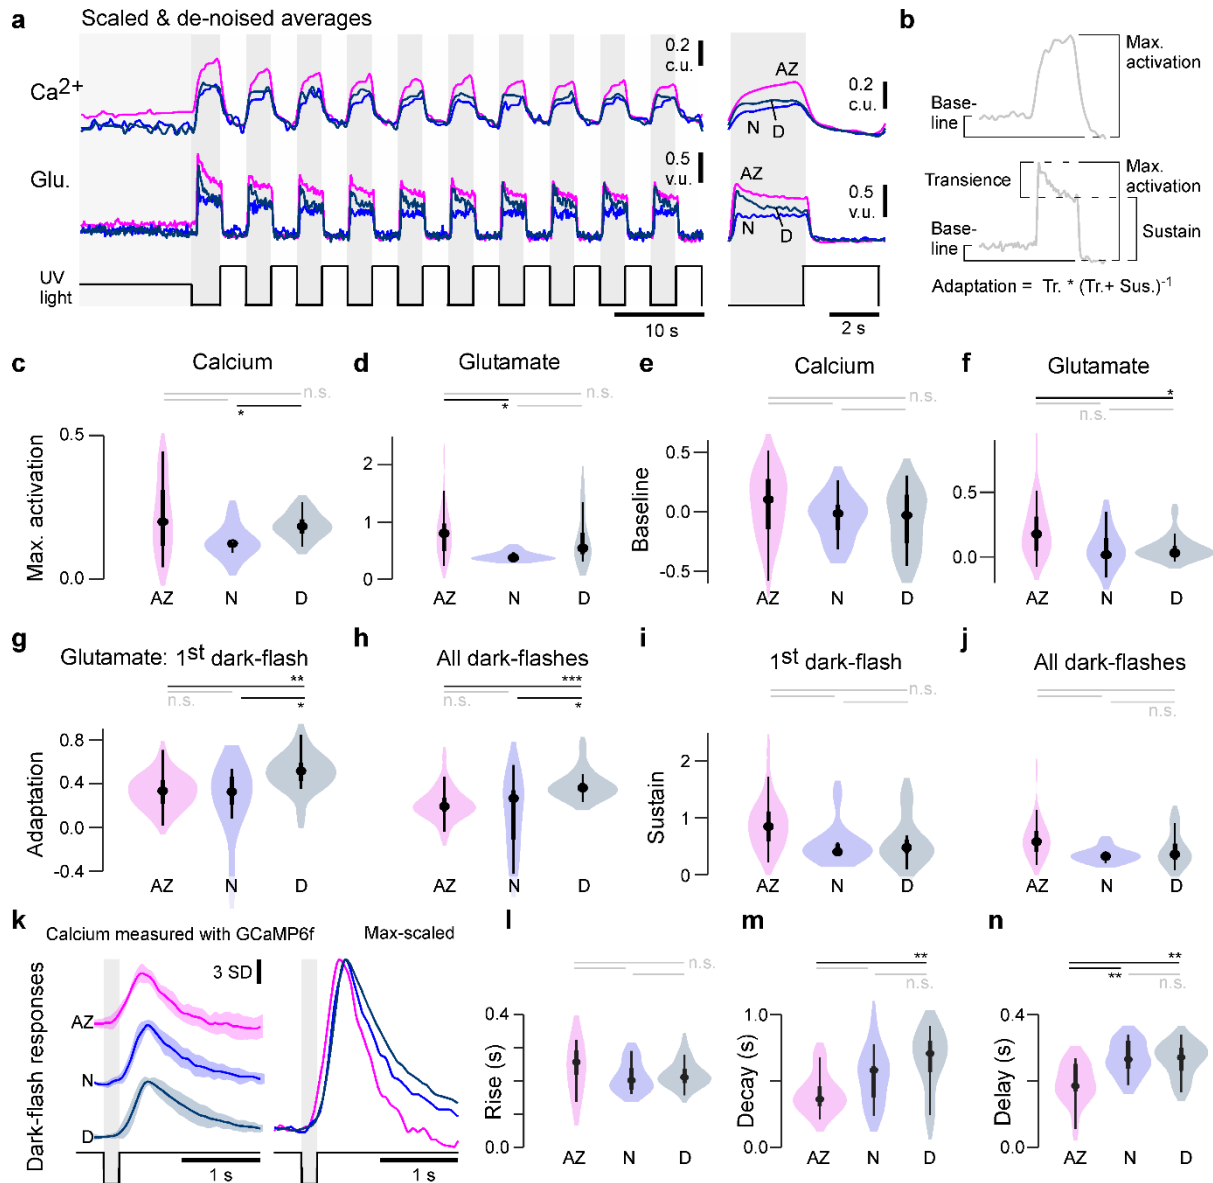

170

171 **Figure 3. Physiological differences in light responses between UV-cones from different eye-regions. a,**  
172 **Scaled and de-noised calcium and glutamate recordings averaged across multiple ROIs (Methods). We refer to the**  
173 **scaling as calcium units (c.u.) and vesicle units (v.u.), as the same traces also serve as input for the biophysical**  
174 **model (see Fig. 4). b, Schema of the calculated indices in (c-j) (Methods). The transience index is computed as**  
175  $\frac{\text{max.} - \text{sustain}}{\text{max.}}$ . **c-j, Quantification of physiological differences for the three different retinal regions (two-sided shuffling**  
176 **test with Bonferroni correction,  $n_{AZ}, n_N, n_D = 30, 9, 16$ , \*  $p < 0.05$ , \*\*  $p < 0.01$ , \*\*\*  $p < 0.001$ ).** **k, GCaMP6f recordings**  
177 **from (Yoshimatsu et al., 2020b). Mean  $\pm$  SD and overlaid mean traces in response to a 200 ms dark flash stimulus.**  
178 **l-n, Quantification of physiological differences for the GCaMP6f recordings: time constants for an exponential rise,**  
179 **decay as well as delay time to response (see also methods) (two-sided shuffling test with Bonferroni correction,**  
180  **$n_{AZ}, n_N, n_D = 13, 17, 22$ , \*  $p < 0.05$ , \*\*  $p < 0.01$ , \*\*\*  $p < 0.001$ ).**

181  
182  
183  
184

To systematically test for consistent differences between synaptic transfer in the three eye regions, we recorded paired calcium and glutamate signals from a total of  $n = 30, 16, 9$  AZ, dorsal and nasal UV-cones from  $n = 3, 4, 4$  fish, respectively (Fig. S2c,d). We then scaled and de-noised each recording

185 (Methods) and computed the mean traces (Fig. 3a) as well as key  
186 parameters relating to the amplitudes and kinetics of calcium and glutamate  
187 signals (Fig. 3b-j). For this, all traces were scaled such that the UV-bright  
188 stimulus intervals had a zero mean and standard deviation of one. We  
189 previously showed that these intervals correspond to the lowest possible  
190 calcium and glutamate release at the stimulus brightness used (Yoshimatsu  
191 et al., 2020b) and can therefore be used as a common baseline across  
192 zones. We present the rescaled traces (Fig. 3a) in c.u. (calcium units) and  
193 v.u. (vesicle units) respectively, to be consistent with the used units in the  
194 model later. Based on the rescaled traces we computed several indices of  
195 calcium and glutamate response amplitudes and their kinetics (Fig. 3b),  
196 which together confirmed and extended initial observations from the single-  
197 pedicle examples (cf. Fig. 2). In particular, both at the level of calcium (Fig.  
198 3c) and glutamate (Fig. 3d), nasal UV-cones exhibited small peak-  
199 amplitudes. In addition, the glutamate release of AZ UV-cones was  
200 increased during the 50% contrast period at the start of the stimulus (Fig. 3f).  
201 In line with previous work, the AZ calcium baseline also appeared elevated  
202 (Fig. 3a), however this difference was not statistically significant (Fig. 3e).  
203 This was likely related to the lower signal-to-noise ratio of jRGeco1b signals,  
204 compared to those of GCaMP6f as used previously (Yoshimatsu et al.,  
205 2020b). Next, we quantified amplitudes of transient and sustained  
206 components at the level of glutamate (Fig. 3b,g-j). For this, we analysed the  
207 first flash response separately from the mean of subsequent ones because  
208 all regions exhibited notably stronger adaptation during the first flash (Fig.  
209 3a). Overall, this consistently revealed the most pronounced within-pulse  
210 adaptation in dorsal UV-cones (Fig. 3g,h), but no significant differences in  
211 the sustained components (Fig. 3i,j).

212 To investigate the differences in presynaptic calcium in more detail, we  
213 reanalysed previously published data of calcium recordings with  
214 SyGCaMP6f in response to a 200 ms “dark flash” (Yoshimatsu et al., 2020b).  
215 The kinetics of calcium responses were similar to each other across the three  
216 zones (Fig. 3k), thus broadly supporting our previous results based on  
217 jRGeco measurements. First, we found similar rise kinetics across all zones  
218 (Fig. 3l) which therefore unlikely linked to the differences observed at the  
219 level of glutamate. Nevertheless, the response in the AZ was weakly but  
220 significantly advanced (i.e. it occurred earlier) compared to nasally or  
221 dorsally (Fig. 3n). Moreover, decay kinetics were significantly faster in AZ  
222 cones compared to dorsal cones (Fig. 3m) contrary to the adaptation index  
223 of the glutamate recordings (Fig. 3g, i), hinting that the release dynamics  
224 were shaped differentially by the synaptic machinery across zones.

225 Taken together, our results so far highlight a range of structural (Fig. 1) and  
226 functional (Figs. 2,3) differences in the synaptic machinery of UV-cones  
227 across different regions of the eye.

228

229

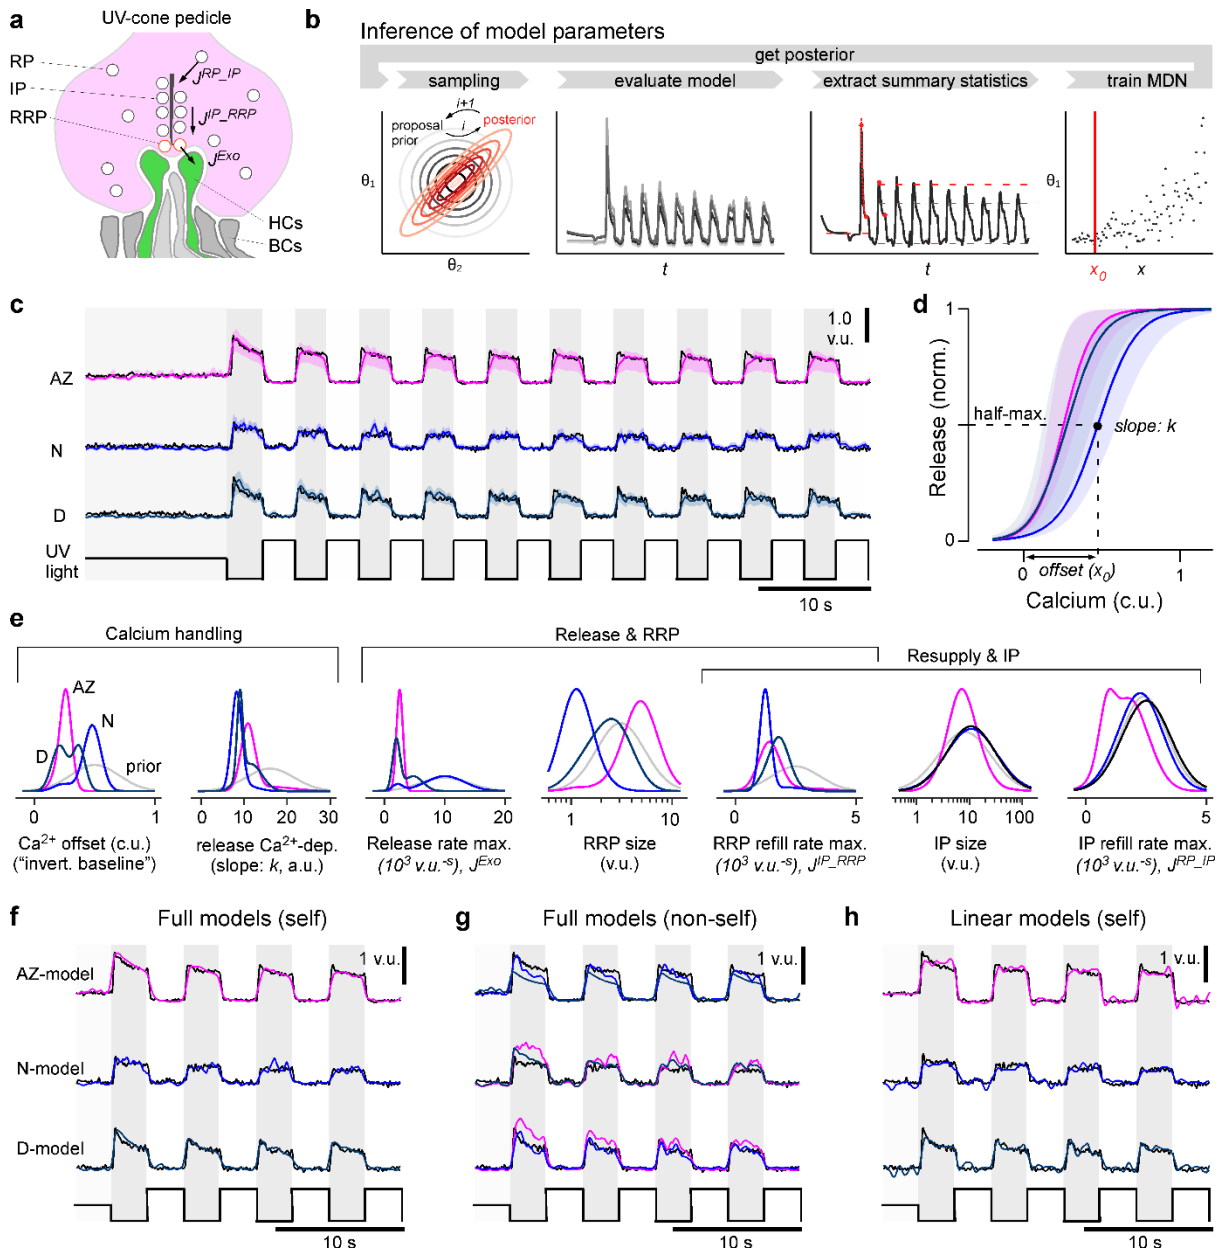

230

231 **Figure 4. A model of calcium evoked release from the ribbon.** **a**, Schema of the movement of vesicles at a  
 232 ribbon synapse. The vesicles move from the reserve pool (RP) to the intermediate pool (IP) at the ribbon and finally  
 233 to the readily releasable pool (RRP) close to the membrane before they are released into the synaptic cleft to  
 234 activate the dendrites of invaginating horizontal cells (HC). **b**, Schema of the parameter inference: Over several  
 235 rounds, samples are first drawn from a prior, the model is then evaluated and summary statistics on which the  
 236 relevant loss function is calculated are extracted. Based on these values and the sampled parameters a mixture of  
 237 density network (MDN) is trained and evaluated to get the posterior / prior for the next round. **c**, Model predictions  
 238 for the three regions (mode and 90% prediction intervals from posterior samples in colour, data in black). **d**, Mode  
 239 and 90% prediction intervals of the model's non-linearity. **e**, Prior and one-dimensional marginals of the posterior  
 240 distributions (see Fig. S4a for the two-dimensional marginals). The units are vesicle units (v.u.) and calcium units  
 241 (c.u.), referring to the scale invariance of the model. **f**, Evaluation of the best region-specific models on its region-  
 242 specific calcium traces. **g**, Evaluation of best region-specific model on the calcium traces of the other regions. **h**,  
 243 Evaluation of the linear baseline model (model in colour, data in black): especially the transient components are  
 244 missed. See Fig. S3b for a quantification of the goodness of the fits.

245

246

247

**A model of glutamate release at the ribbon synapse.** To systematically explore the possible mechanistic basis of the observed eye-wide variations in UV-cone synaptic functions, we next modelled the release machinery of



248 the ribbon with a biophysical interpretable model that converts calcium  
249 signals to glutamate release (Baden et al., 2014; Schröder et al., 2019). The  
250 model consisted of three different vesicle pools (reserve pool (*RP*),  
251 intermediate pool (*IP*) and readily releasable pool (*RRP*)), the changing rates  
252 between these pools ( $J^{RP\_IP}$ ,  $J^{IP\_RRP}$ ,  $J^{Exo}$ ) and a sigmoidal non-linearity with  
253 slope  $k$  and offset  $x_0$  which converts the calcium concentration into the final  
254 glutamate release (Fig. 4a, Methods). Building on recent advances in  
255 simulation-based Bayesian inference (Gonçalves et al., 2020; Lueckmann et  
256 al., 2017), we estimated posterior distributions over the model parameters  
257 for each of the region-specific datasets. In summary, the inference methods  
258 iterated the following steps over several rounds (Fig. 4b): First we draw  
259 samples from a prior distribution, evaluated the model and extracted  
260 summary statistics on which the relevant loss was computed. Based on  
261 these loss values and the sampled parameters a mixture of density network  
262 was trained and finally evaluated to get the posterior of one round which was  
263 used as the prior for the next round. For the summary statistics, we defined  
264 features which captured all essential components of the release dynamics,  
265 such as transient and sustained components or peak heights (Fig. 4b,  
266 Methods). The model fitted the functional data well and accurately modelled  
267 the pronounced first UV-flash response differences between zones (Fig. 4c).  
268 From here, the inferred posteriors (see Fig. S4a for two dimensional  
269 marginals) allowed us to compare the likely parameters between the different  
270 zones, including the estimated uncertainties. This allowed pinpointing  
271 possible key differences: For example, the calcium offset ( $x_0$ , which can be  
272 understood as the inverted calcium baseline, Methods) was markedly  
273 increased in the nasal model (Fig. 4d,e). In contrast, in case of maximal  
274 release rate, the posterior for the nasal data stayed close to the prior,  
275 indicating that this parameter was not essential to reproduce the traces. For  
276 RRP sizes and associated maximal refill rates the model required the  
277 smallest values nasally (Fig. 4e). The posteriors for IP size and associated  
278 refill rates were rather broad and did not allow to identify regional differences.  
279 Interestingly, with few exceptions (e.g. the maximal release rate and calcium  
280 offset), the parameter posteriors were mostly uncorrelated (Fig. S4a),  
281 indicating that there is only little structure in the optimal parameter  
282 landscape. This also suggests that the model and data leave little room for  
283 possible compensatory mechanisms, as this would result in a clear  
284 correlation of the involved parameters.

285 To confirm that the different model outputs do not simply rely on differences  
286 in the calcium inputs but rather on the differences of the inferred parameters,  
287 we compared the performance of the zone-specific models by shuffling the  
288 inferred parameters and glutamate datasets pairwise across zones (Fig. 4f,g,  
289 Fig. S4b). The match between the model output and measured glutamate  
290 release for a calcium input was generally worse for parameters  
291 corresponding to a different region, confirming that our release models were  
292 indeed regionally specific. For example, the sustained component of the AZ  
293 could not be captured by either the dorsal or nasal models (Fig. 4g).  
294 Moreover, the models produced different transient behaviours independent

295 of the calcium inputs (Fig. 4f,g). A quantification of this model comparison  
296 shows that the shuffled models achieved lower loss values when evaluated  
297 on self-, compared to non-self calcium inputs (Fig. S4b,c). The model  
298 differences were especially high on the relevant loss (Fig. S4b), which was  
299 based on the summary statistics and paid special attention to features like  
300 transiency. However, already the mean squared error (MSE) as loss function  
301 confirmed this difference: the region-specific models evaluated on self  
302 calcium inputs outperformed the models on non-self inputs (Fig. S4c).  
303 Additionally, we compared the biophysical model to a statistical linear  
304 baseline model (Methods). While as expected the linear model captured the  
305 general shape of the flash responses, it was not able to model glutamate  
306 transients nor adaptation over several flashes (Fig. 4h). This also resulted in  
307 much higher loss values for the relevant loss function compared to the best  
308 biophysical model, which indicates the mismatch for essential features such  
309 as transiency (Fig. S4b). The biophysical model also outperformed the linear  
310 model in terms of the MSE (Fig. S4c). Together, this indicates that our  
311 modelling approach was sufficiently detailed for the posed problem,  
312 suggesting that the posterior distributions of each regional model can  
313 usefully inform about the differences that underpin region-specific transfer  
314 functions from synaptic calcium to release via the ribbon.

315 **Predicting region-specific processes.** An important strength of our  
316 modelling approach was that it allowed systematically exploring the possible  
317 influence of parameters such as vesicle pool sizes, their vesicle movements,  
318 and their calcium dependence, on the model output. To this end, we  
319 conducted a sensitivity analysis by computing the first order Sobol indices  
320 (Methods), a measure of the direct effect of each parameter on the variance  
321 of the model output. More specifically, it denotes the expected reduction in  
322 relative variance of the model output if we fix one parameter. For the  
323 computation of the Sobol indices, broadly speaking, a large number of  
324 parameters were drawn from the posterior distribution and the model was  
325 evaluated on these parameters. Afterwards the reduction in variance of the  
326 model evaluations was computed if one dimension of the parameter space  
327 was fixed (for details see Methods). The Sobol indices revealed a generally  
328 high influence of the calcium parameters ( $x_0$  and  $k$ ) during UV-bright periods  
329 and around light-dark transitions in all three zones (Fig. 5a-c, top row). In  
330 contrast, beyond an initial key role of the RRP size for shaping the first dark-  
331 flash response, pool sizes generally played only relatively minor roles (Fig.  
332 5, bottom row). Instead, the most obvious region-wise differences occurred  
333 amongst vesicle transition rates between the pools. For example, the refilling  
334 rate of the IP from the RP ( $J^{RP-IP}$ ) was increasingly critical for shaping dark  
335 flash responses in the AZ-model (Fig. 5a, blue) but had comparatively little  
336 influence in the nasal model (Fig. 5b, blue). In contrast, the maximal release  
337 rate ( $J^{Exo}$ ) particularly influenced the variance in early dark flash responses  
338 in the dorsal model (Fig. 5c, green), while nasally refilling of the RRP from  
339 the IP ( $J^{IP-RRP}$ ) played a greater role (Fig. 5b, yellow). Together, this analysis  
340 suggests that particularly the rates of vesicle transfer between pools, rather  
341 than the pool sizes themselves or their calcium dependence, may underpin

342 the experimentally observed region wise differences in release properties  
343 from zebrafish UV-cones *in vivo*.

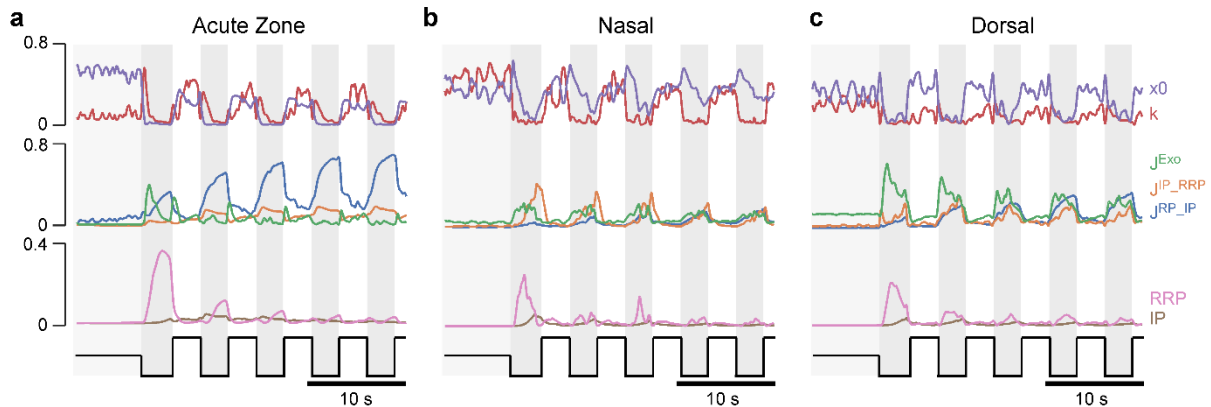

344

345 **Figure 5. Sobol Indices. a-c,** Sensitivity of the model for the different model parameters measured by the Sobol  
346 Index (Methods). The Sobol Index measures the expected reduction in relative variance for the fixation of parameter  
347  $\theta_i$ . It depends on the posterior distribution and is therefore different for the fits to the three regions.

348 **General rules of ribbon tuning.** We next sought to explore the general  
349 parameter landscape underlying release from the ribbon. For this, we  
350 calculated the same indices as in the corresponding data from 2P imaging  
351 (Fig. 3), but this time on the model output obtained by simulating the model  
352 with parameters drawn from the posterior distributions. As expected, this  
353 reproduced the trends previously measured *in vivo*, including the low  
354 maximal activation nasally (Fig. 6a), the largest transient component dorsally  
355 (Fig. 6b), and the largest sustained component in the AZ (Fig. 6c).

356 From here, we simplified the model by fixing the slope of the calcium non-  
357 linearity ( $k$ ) and defining vesicle change rates as fractions of the  
358 corresponding pool sizes (Methods). To be able to stimulate the model with  
359 arbitrary “light” stimuli, we moreover implemented a linear calcium model  
360 based on a convolution with a biphasic kernel to reflect cone-activation by  
361 light (Schnapf and Baylor, 1987), and monophasic kernel to reflect calcium  
362 kinetics (Baden et al., 2014). This latter kernel was varied in subsequent  
363 simulations to explore the impact of calcium kinetics on synaptic  
364 performance (Methods). Together, this allowed us to reduce the parameter  
365 space while at the same time identifying underlying computational principles.  
366 In the following, we always included the three fitted eye-region specific  
367 parameter sets as a point of comparison (coloured “dots” on top of heatmaps  
368 in Figs. 6,7). These dots should be treated with some caution, since in the  
369 simplified model they do not necessarily match the original ones in every  
370 dimension.

371 Exploring this model (Fig. 6d-f), we found that both maximal activation (Fig.  
372 6d) and the size of the sustained component (Fig. 6f) could be tuned by  
373 varying RRP and/or IP pool sizes (left column), with negligible contributions  
374 from the maximal release rate or the calcium offset (right column). In  
375 contrast, the transient component primarily hinged on the maximal release  
376 rate (Fig. 6e, right column), with more complex additional contributions from  
377 the interplay of vesicle pool sizes (left column). Accordingly, our generalised

378  
379  
380  
381  
382  
383

model suggests that transient and sustained responses can be defined largely non-overlapping properties of the ribbon, possibly providing a powerful handle in for their independent tuning. For further exploration, the full model is available online as an interactive tool (Fig. 6g) via *google colab* (<http://www.tinyurl.com/h3av1ga>) or on *github* ([https://github.com/coschroeder/cone\\_ribbon](https://github.com/coschroeder/cone_ribbon)).

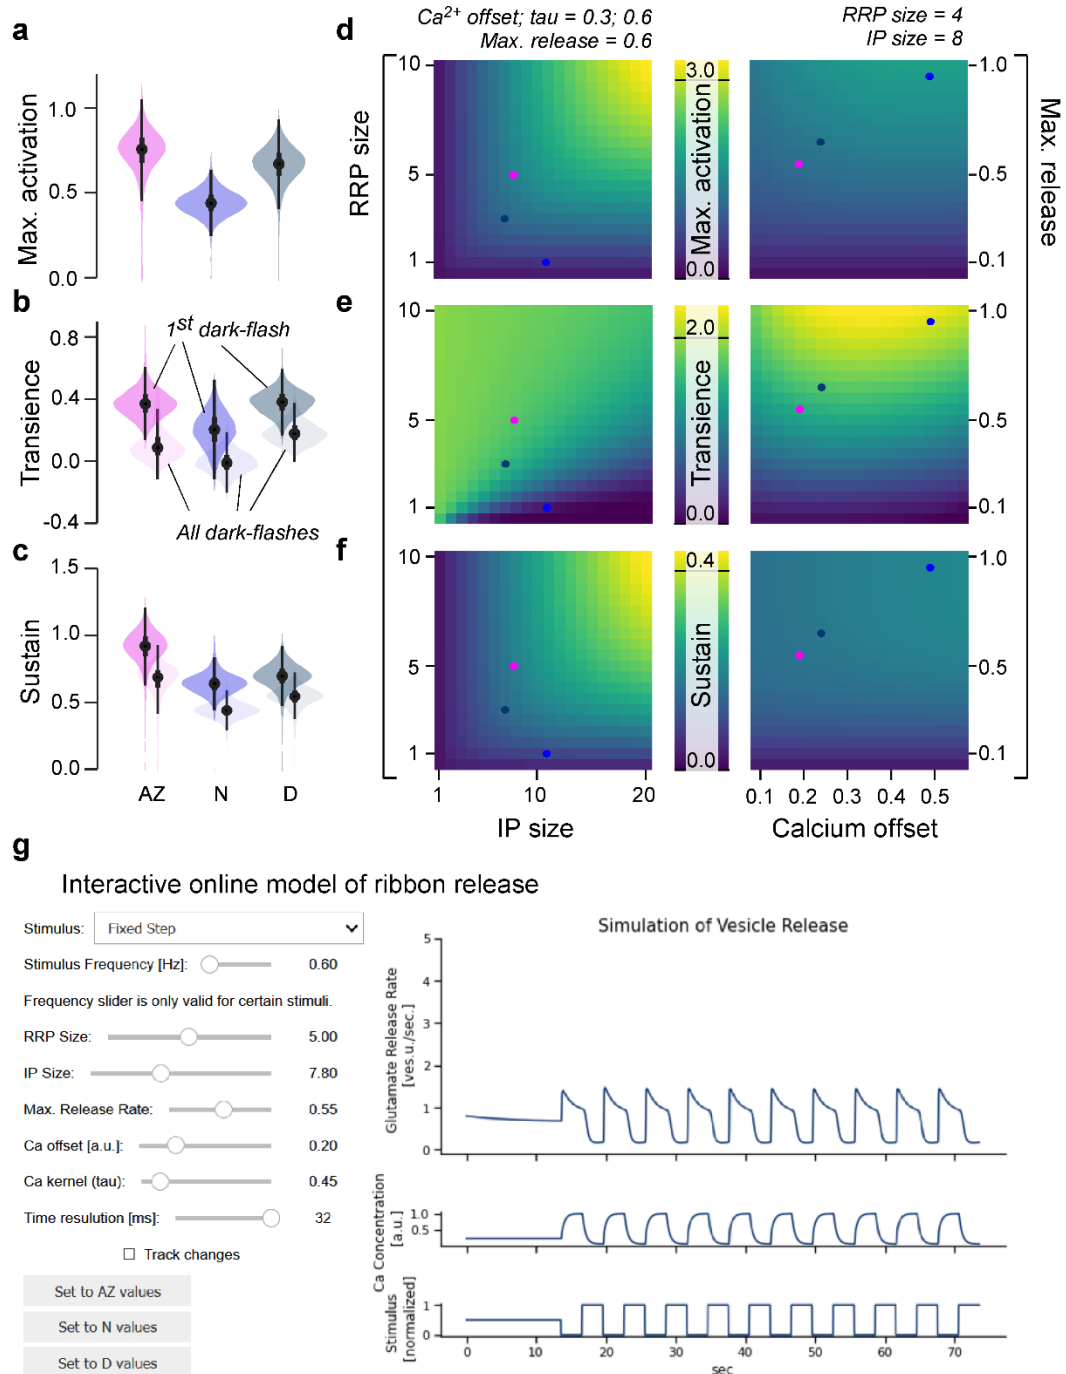

384

385 **Figure 6. General rules of ribbon tuning: Basic response parameters.** **a-c.** The same indices as in Fig. 3, but  
386 here calculated on 10,000 model evaluations on samples from the posteriors. The model has learned the  
387 differences between the retinal regions and reproduces these differences (see Fig. 3 for comparison). **d-f,** Indices  
388 as in (a-c), calculated on different parameter combinations as indicated. For this analysis, a step-stimulus feeding  
389 into a linear calcium model was added as the input to the release model (Methods). For definition of the indices see  
390 also Fig. 3b. **g,** Screenshot of the interactive online model, available at <http://www.tinyurl.com/h3av1ga>.

391  
392  
393  
394  
395  
396  
397  
398  
399  
400  
401  
402  
403  
404  
405  
406  
407

**Frequency dependence and event detection.** In a final step, we explored the model behaviour on new stimuli and investigated the influence of the model parameters on different coding properties of the synapse. First, we measured the detectability of a high amplitude dark-event amongst an otherwise noisy stimulus sequence (Fig. 7a, Methods). This highlighted the calcium offset ( $x_0$ ) as a key parameter (Fig. 7b). Once  $x_0$  is set, additional benefits could be gained from increasing RRP-size but only small benefits from increasing IP size (Fig. 7c), ideally in further combination with a high maximal release rate (Fig. 7d). We next measured the detectability of light-events in the same way (Fig. 7e, Methods). This showed that beyond an inverse dependence on calcium baseline (Fig. 7f cf. Fig. 7b), the ribbon parameters that benefitted the detection of On- and Off-events were in fact virtually identical (Fig. 7g,h, cf. Fig. 7c,d). The low calcium offset (i.e. high baseline) supporting the detection of On-events is in line with our previous work (Yoshimatsu et al., 2020b), where the AZ showed highest calcium baseline and an enhanced ability to detect visuo-ecologically important UV-On events such as the presence of prey.

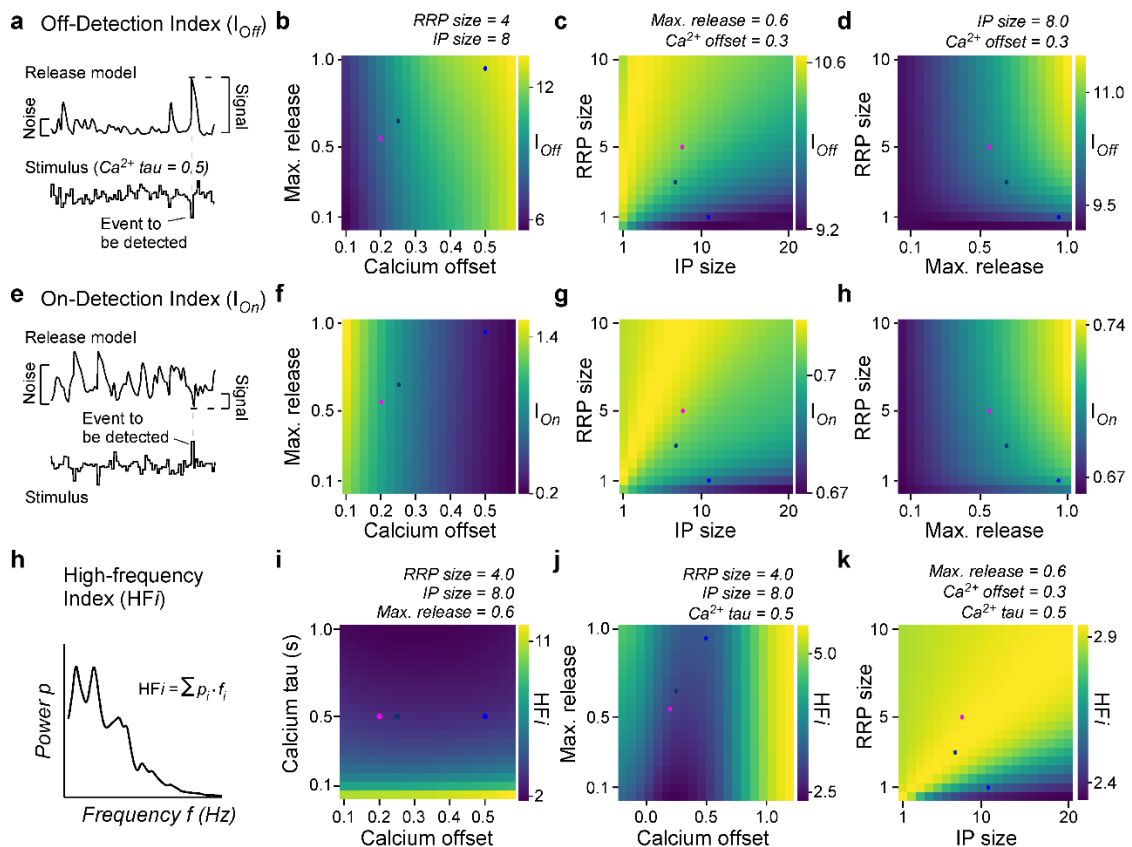

408

409 **Figure 7. General rules of ribbon tuning: Event detection and high-frequency encoding.** a, An Off-Detection  
410 index ( $I_{Off}$ ) measures the model's baseline-noise normalised response amplitude to an Off-event in the stimulus as  
411 indicated (Methods). b-d,  $I_{Off}$  for different parameter combinations. e-h, as (a-d), but for an On-detection index ( $I_{On}$ ).  
412 h, The high-frequency index (HFi) is a weighted sum of the discretized power spectrum and indicates the behaviour  
413 in a high frequency regime. i-k, HFi for different parameter combinations. The fixed parameters are shown as titles  
414 in each panel. Note the different colour scales between panels. Further note that in (j) we explored the  $x_0$  parameter  
415 space up to extreme response behaviour, which may not be physiologically plausible.

416  
417

Finally, we explored how well different ribbon models could transmit fast temporal flicker, here summarised by a high-frequency index (HFi) (Fig. 7h,



418 Methods). This revealed that this property primarily depended on the calcium  
419 kinetics, rather than the specific tuning of the ribbon itself (Fig. 7i-k). Beyond  
420 calcium dynamics (here, fixing the time constant  $\tau$  for calcium at 0.5 s), again  
421 the calcium offset (Fig. 7j) as well as an approximate balance of medium-  
422 sized pools for both the RRP and IP (Fig. 7k), could provide additional  
423 support for encoding high-frequency components.

## 424 DISCUSSION

425 Combining ultrastructural evidence (Fig. 1), *in vivo* dual-colour 2-photon  
426 imaging (Figs. 2,3) and computational modelling (Figs. 4,5) we have shown  
427 how ribbon synapses belonging to the same neuron type can be regionally  
428 tuned to support distinct synaptic transfer functions depending on their  
429 location in the eye. Our findings complement and extend our recent  
430 demonstration that also upstream properties of these UV-cones, are  
431 regionally tuned to support different visuo-ecological functions (Yoshimatsu  
432 et al., 2020b). We then further generalised this model to explore how specific  
433 properties ribbon function can be principally used and traded off against one  
434 another to achieve a broad range of synaptic properties (Fig. 6,7).

435 **Linking ribbon structure and function.** Our findings that both UV-cone  
436 ribbon ultrastructure (Fig. 1) and their effective synaptic transfer (Fig. 2,3)  
437 systematically differed between regions supports the notion that these two  
438 sets of properties are linked (Regus-Leidig and Brandstätter, 2012; Sterling  
439 and Matthews, 2005; Wichmann and Moser, 2015). However, building a  
440 direct bridge between them remains difficult. This difficulty is part related to  
441 the absence of a direct experimental link between our EM- and 2P-datasets,  
442 which we did not attempt in view of its extreme technical challenges (Holler  
443 et al., 2021) that to our knowledge have not been overcome for any ribbon  
444 synapse. Moreover, there is often more than one possible interpretation  
445 between a finding from EM and its functional consequence. For example, the  
446 size of a ribbon is expected to be linked to the number of vesicles it can hold.  
447 However, this link presumes that ribbon-attached vesicle density is fixed,  
448 which may not be the case, for example due to conceivable variations in  
449 available binding sites, or amongst vesicle-transfer rates between pools (e.g.  
450 Fig. 4).

451 Such possible complexity is illustrated in case of UV-cone regional  
452 variations: For example, dorsal ribbons were by far the smallest and least  
453 numerous (Fig. 1d,f). From here, it is tempting to speculate that therefore  
454 their effective IP size, and perhaps also their RRP size, might be  
455 comparatively small. However, dorsal UV-cones also had a particularly high  
456 vesicle density near the ribbon, while instead nasal UV-cones had markedly  
457 reduced vesicle density here despite their otherwise large ribbons (Fig. 1g,  
458 Fig. S1). This strongly suggest that looking at ribbon geometry alone may be  
459 insufficient to accurately predict effective pool sizes. Instead, joint  
460 consideration of ribbon area and vesicle density may be more informative as  
461 supported by our model, which produced a near-identical IP size and  
462 generally low RRP sizes for both nasal- and dorsal UV-cones (Fig. 4e). In

463 agreement, AZ-cones combined large ribbons with a high vesicle density  
464 near the ribbon, and in their case the model did predict the largest RRP size  
465 (though a similar IP size). Although the differences of RRP sizes which were  
466 inferred by the model did not match the anatomical numbers quantitatively,  
467 we were able to infer the trends of the differences in the anatomical  
468 structures from pure functional data. Notably, model IP sizes generally  
469 stayed near the prior (Fig. 4e) and exhibited low Sobol indices (Fig. 5), which  
470 suggests that this property was not critical for explaining the glutamate  
471 responses to our relatively slow and simple test stimulus which was  
472 necessitated by the generally low SNR of jRGeco1b signals (Fig. 2). It  
473 remains possible that regionally distinct IP-size estimates would emerge in  
474 response when fitted to responses to different stimuli.

475 Beyond ribbon sizes, our ultrastructural analysis further highlighted an  
476 elevated vesicle density further away from the ribbon in AZ UV-cones (Fig.  
477 1g, Fig. S1), potentially indicative of an increased RP and/or an increased  
478 rate of IP refilling. However, the model produced only minor differences in IP  
479 refill rates between regions, but in the reversed order (Fig. 4e), and for  
480 simplicity RP size was fixed because it did not strongly affect function within  
481 the tens of seconds timescales interrogated (Baden et al., 2014).  
482 Accordingly, a direct link between UV-cone RP vesicle density and function  
483 remains outstanding. Conceivably, this property could be helpful for  
484 supporting the particularly high total vesicle turnover in AZ-cones (Fig. 3d,f,i)  
485 at longer timescales.

486 At the level of measured function, dorsal cones stood out in that their release  
487 was particularly transient (Fig. 3a,g,h) as would be suited for pulsatile, rather  
488 than continuous transmission. Their generally small but densely populated  
489 ribbons and small RP may be well suited to support this property. In possible  
490 agreement, the model predicted a faster RRP refill rate in dorsal cones,  
491 which might be useful to ensure the RRP is rapidly replenished after each  
492 pulse. Conversely, the effective absence of any transient component nasal  
493 UV-cones (Fig. 3a,g,h) in the model resulted in the lowest RRP refill rate,  
494 which may appear counterintuitive, but paired with a small nasal RRP  
495 resulted in the sustained response behaviour observed in Fig. 4f.  
496 Additionally, this may further link to the abovementioned low IP occupancy  
497 in nasal UV-cones, as observed under EM (Fig. 1g). Moreover, the nasal  
498 model simultaneously predicted the smallest RRP but the largest RRP  
499 release rate, which resulted in a situation where the very few vesicles ready  
500 for release were immediately dumped, thus preventing the build-up of  
501 vesicles that enable the transients of dorsal and AZ UV-cones. Importantly,  
502 most functional differences across retinal regions appeared at the level of  
503 glutamate, whereas only subtle differences in the dynamics were observed  
504 at the level of calcium. The faster decay in AZ (Fig. 3m) is linked to horizontal  
505 cells as reported previously (Yoshimatsu et al., 2020b), and the temporally  
506 advanced calcium signals measured in the AZ by GCaMP6f (Fig. 3n) cannot  
507 explain the differences in the glutamate dynamics. Moreover, while it  
508 remains possible that the iGluSnFR recordings slightly distorted the time-

509 courses of glutamate signals, it is unlikely to strongly affect our conclusions,  
510 because any such effects would apply equally to all measured eye regions.

511 Taken together, while it remains difficult to make definitive links between  
512 ribbon structure and function, a number of inferences can be drawn which  
513 may usefully inform our understanding of the ribbon's role in moulding  
514 synaptic transmission to specific needs.

515 In the future it will be interesting to explore to what extent the differential  
516 ribbon tunings described here for larvae are also a characteristic of UV-  
517 cones in adult zebrafish. Adults feature a crystalline cone mosaic (reviewed  
518 in (Baden, 2021)), meaning that numerical anisotropies in cones as they  
519 occur in larvae (Zimmermann et al., 2018) are not expected. However, this  
520 does not preclude the possibility that UV-cones have different properties  
521 across the retina. While adult zebrafish display a much broader array of  
522 visual behaviours compared to larvae, their visual ecology remains poorly  
523 explored, which makes it difficult to predict what UV-cone tunings – if any -  
524 might be expected.

525 **Model and simulation-based inference.** The presented model (Fig. 4a) is  
526 a modified version of the basic framework used in (Baden et al., 2014). Here  
527 we extended the approach by combining simulation-based inference with  
528 simultaneous calcium and glutamate recordings to extensively expand the  
529 analysis of the model. Moreover, rather than modelling discrete vesicle  
530 movements as in (Schröder et al., 2019), our continuous model enabled the  
531 use of available software toolboxes (Methods). With the simulation-based  
532 inference approach (Fig. 4b) we obtained full posterior distributions (Fig. 4e)  
533 rather than point estimates which can lead to overconfident or incorrect  
534 conclusions in the case of an under-constrained model or “sloppy” model  
535 parameters. At the same time, posterior estimates can be seen as a global  
536 method to identify sloppy and stiff parameters (in contrast to local methods  
537 as in (Gutenkunst et al., 2007)), and additionally allowed us to conduct a  
538 sensitivity analysis by computing the first Sobol indices (Fig. 5). These focus  
539 on the variance of the model output rather than on the variance of the  
540 posterior distributions and showed zone dependent, biologically  
541 interpretable time courses. This highlighted a time varying dependence of  
542 the release on the model parameters. It indicates that already a simple step  
543 stimulus is sufficient to show the influence of different anatomical properties  
544 on features of the signal. Finally, by establishing an interactive online model  
545 we encourage further exploration of the model and testing of hypotheses.

546 **General rules of ribbon tuning.** Bringing together the model and observed  
547 differences in response behaviour, we tested our model on new stimuli and  
548 computed indices (Fig. 7) which might be relevant to a broad range of  
549 sensory scenarios. For all investigated properties, we observed that the  
550 baseline and dynamics of the calcium signal were critical (Fig. 7b,f,i),  
551 whereupon the anatomical ribbon properties allowed fine-tuning the final  
552 output behaviour (Fig. 7c,g,k).

553 Interestingly, the influence of the calcium baseline for the detection of high-  
554 frequency events followed a bimodal distribution (Fig. 7j) with intermediate  
555 values offering the poorest performance. In combination with the  
556 approximately equal and opposite effects of calcium baseline on the  
557 detectability of On- and Off-events (Fig. 7b,f), this suggest that the calcium  
558 baseline may present a key variable that enables ribbons to trade-off the  
559 transmission of high frequency stimuli against providing an approximately  
560 balanced On- and Off- response behaviour. Vice versa, it also suggests that  
561 the transmission of high-frequency events benefits from the use of a highly  
562 non-linear synapse that is either balanced to On- or Off-events, but not both.  
563 Finally, and perhaps unsurprisingly, the time-course of calcium decay was  
564 pivotal for defining the possible working range of high-frequency  
565 transmission regardless of the properties of the ribbon itself (Fig. 7i, cf. Fig.  
566 7j,k). This effect was especially strong for a fast calcium decay (< 100 ms)  
567 which is generally associated with nanodomains (Jarsky et al., 2010) rather  
568 than decay dynamics >>100 ms for microdomains (Beaumont et al., 2005).  
569 To what extent nano- or microdomain signalling dominates in larval zebrafish  
570 UV-cones remains untested. However, in view of their similarity in pedicle  
571 architecture to mammalian rods (e.g. small, single invagination site), it  
572 seems likely that also here already low micromolar calcium concentrations  
573 that are typically associated with microdomains can evoke substantial  
574 release (Thoreson et al., 2004). In any case, a primary determinant for tuning  
575 a ribbon's high-frequency response is the local stimulus-driven calcium  
576 environment around the ribbon, rather than properties of the ribbon itself (see  
577 also (Baden et al., 2014, 2013a)). Nevertheless, once this is set, large pool  
578 sizes paired with a high release rate were generally preferable for all  
579 explored forms of signal detection. Taken together, our model therefore  
580 suggests that while the pre-synaptic calcium is a critical variable, even with  
581 a fixed calcium model the ribbon can be shifted into different response  
582 behaviours.

583 The effect and importance of calcium handling has also been shown in  
584 ribbon synapses of inner hair cells, where even within an individual synaptic  
585 compartment a local variation in calcium channels can lead to different  
586 transfer functions at different release sides (Özçete and Moser, 2021).  
587 Similar to the presented differences in UV-cones, such local heterogeneity  
588 in inner hair cells might help to diversify the sensory signal and highlight  
589 different features for downstream neurons.

590

591

592

## METHODS

593

594

595

596

597

598

599

600

601

602

**Animals.** All procedures were performed in accordance with the UK Animals (Scientific Procedures) act 1986 and approved by the animal welfare committee of the University of Sussex. Animals were housed under a standard 14:10 day/night rhythm and fed three times a day. Animals were grown in 0.1 mM 1-phenyl-2-thiourea (Sigma, P7629) from 1 *dpf* to prevent melanogenesis. For 2-photon *in-vivo* imaging, zebrafish larvae were immobilised in 2% low melting point agarose (Fisher Scientific, BP1360-100), placed on a glass coverslip and submerged in fish water. Eye movements were prevented by injection of a-bungarotoxin (1 nL of 2 mg/ml; Tocris, Cat: 2133) into the ocular muscles behind the eye.

603

604

605

606

607

608

609

For all experiments, we used 6-7 days post fertilization (*dpf*) zebrafish (*Danio rerio*) larvae. The following previously published transgenic lines were used: *Tg(cx55.5:nlsTrpR)*, and *Tg(tUAS:SF*i*GluSnFR)* (Yoshimatsu et al., 2020b). In addition, *Tg(gnat2:SyjRGco1a)* lines were generated by injecting pTol2CG2-gnat2-SyjRGco1a, plasmids into single-cell stage eggs. Injected fish were out-crossed with wild-type fish to screen for founders. Positive progenies were raised to establish transgenic lines.

610

611

612

613

614

615

616

617

The plasmid was made using the Gateway system (ThermoFisher, 12538120) with combinations of entry and destination plasmids as follows: pDESTtol2CG2 (Kwan et al., 2007), p5E-gnat2 (Lewis et al., 2010; Yoshimatsu et al., 2016), pME-SyjRGco1a, p3E-pA. Plasmid pME-SyjRGco1a was generated by inserting a polymerase chain reaction (PCR)-amplified jRGco1a (Chen et al., 2013; Dana et al., 2016) into pME plasmid and subsequently inserting a PCR amplified zebrafish synaptophysin without stop codon at the 5' end of jRGco1a.

618

619

620

621

622

623

624

625

626

627

628

**Electron Microscopy.** We used a previously published EM dataset of the larval zebrafish outer retina for this study (Yoshimatsu et al., 2020a). In the original paper, we only used one image stack from the acute zone, but here we have in addition included two further stacks from nasal and dorsal regions, respectively. Image stacks were concatenated and aligned using TrackEM (NIH). The cones and ribbons were traced or painted using the tracing and painting tools in TrackEM2 (Cardona et al., 2012). Vesicle density on the ribbons was measured in 6 representative sections per cone. We selected sections where ribbons were aligned perpendicular to the sections. Ribbon release site length and area were measured in the 3D reconstruction of the ribbons.

629

630

631

632

633

634

635

636

**2p imaging.** All 2-photon imaging was performed on a MOM-type 2-photon microscope (designed by W. Denk, MPI, Martinsried; purchased through Sutter Instruments/Science Products) equipped with a mode-locked Ti:Sapphire laser (Chameleon Vision-S, Coherent) tuned to 980 nm. We used two fluorescence detection channels for iGluRSnFR (F48x573, AHF/Chroma) and jRGco1a (F39x628, AHF/Chroma), and a water immersion objective (W Plan-Apochromat 20x/1,0 DIC M27, Zeiss). For image acquisition, we used custom-written software (ScanM, by M. Mueller,



637 MPI, Martinsried and T. Euler, CIN, Tuebingen) running under IGOR pro 6.3  
638 for Windows (Wavemetrics). Recording configuration was 124 x 32 pixels  
639 (2ms per line, 15.6 Hz). Light stimuli were delivered through the objective,  
640 by band-pass filtered light emitting diodes (LEDs, 'red' 588 nm, B5B-434-TY,  
641 13.5cd, 8°, 20 mA; 'green' 477 nm, RLS-5B475-S; 3-4 cd, 15°, 20mA; 'blue'  
642 415 nm, VL415-5-15; 10-16 mW, 15°, 20 mA; 'ultraviolet, UV' 365 nm,  
643 LED365-06Z; 5.5 mW, 4°, 20 mA, Roithner, Germany).

644 All LEDs were jointly further filtered using FF01-370/36 (AHF/Chroma) and  
645 synchronized with the scan retrace at 500 Hz using a microcontroller as  
646 described in (Zimmermann et al., 2020). The LED intensity was  $1 \cdot 10^5$ , and  
647  $2 \cdot 10^5$  photons per cone per second for adaptation period and UV flash,  
648 respectively, which corresponds to a low-photopic regime. A stimulus time  
649 marker embedded in the recording data was aligned the traces with a  
650 temporal precision of 2 ms. For all experiments, animals were kept at  
651 constant background illumination for at least 5 s at the beginning of each  
652 recording to allow for adaptation to the laser. Regions of interest (ROIs),  
653 corresponding to individual presynaptic terminals of UV-cones were defined  
654 manually. For calcium, we restricted ROIs within 1  $\mu\text{m}$  from the release site  
655 at a terminal, while for glutamate we placed ROIs on the horizontal-cell  
656 dendrites immediately adjacent to a given cone, as previously (Yoshimatsu  
657 et al., 2020b). To unequivocally identify UV-cones, responses to the 'red',  
658 'green', 'blue' and 'UV'-flashes were always recorded (always 1 s flash, 1 s  
659 darkness). Only cones that preferentially responded to the UV-LED were  
660 kept for further analysis (Yoshimatsu et al., 2020a).

661

662 **Scaling and Denoising.** We preprocessed the recorded and z-scored  
663 fluorescence traces as follows (see Fig. S3 for a visualization): First, we  
664 applied a linear baseline correction to the calcium traces to correct a linear  
665 baseline decay. Then we rescaled the calcium and glutamate traces by z-  
666 scoring the traces with respect to the mean and standard deviation of the  
667 UV-bright stimulus intervals, resulting in a mean of zero and a standard  
668 deviation of one in these intervals. By doing so we assumed that within these  
669 periods calcium channels are closed and recorded activity is either due to  
670 noise in the recording process or inherent channel/vesicle noise in the  
671 synapse. With this normalization, we achieved a similar scaling for all traces  
672 independent of the level of indicator expression. Based on these  
673 preprocessed data (Fig. S3a,b second rows), the indices in Fig. 3c-j were  
674 computed.

675 For the model input, we further averaged each zone over the trials and then  
676 applied a Butterworth filter of order three with a cut-off frequency of 5 Hz to  
677 denoise the signals. Since the output of the model was in vesicles per  
678 second, we finally shifted the processed glutamate data by its minimal value  
679 such that it had only positive values. To use the calcium concentration as  
680 input to the model, we additionally applied a Wiener deconvolution with the  
681 kernel of the calcium indicator JRGeco1 to the data (assuming a SNR of 10  
682 for  $f < 1\text{Hz}$  and a SNR of 1/20 for  $f > 1\text{Hz}$ ). The resulting pair of

683 calcium/glutamate data per zone (Fig. S3 last row, also Fig. 3a) was finally  
 684 used in the subsequent model.

685  
 686 *Analysis of the SyGCaMP6f data from* (Yoshimatsu et al., 2020b).  
 687 The z-scored (GCaMP6f) calcium data was smoothed with a sliding average  
 688 (window size of 100ms). Then two exponential functions (  $f(x) = c + a \cdot$   
 689  $\exp(-\frac{1}{\tau} \cdot x)$  ) were fitted to the rise and decay periods. The time shift was  
 690 defined via the start of the calcium rise, more precisely as  $\min_t(Ca(t) > 3 \cdot$   
 691  $std(Ca))$ .

693 **Data indices. Maximal activation, Sustain and Transience:** To be less prone  
 694 to noise we used the 90<sup>th</sup>- and 50<sup>th</sup>-percentiles ( $p_i$ ) to calculate the maximal  
 695 activation, transience and sustain:

696 
$$\max = p_{90}(x_{[t_0, t_1]}),$$
  
 697 
$$\text{sustain} = p_{50}(x_{[t_2, t_3]}),$$
  
 698 
$$\text{transience} = \frac{\max - \text{sustain}}{\max},$$

699  
 700 where  $x$  was the calcium/glutamate recording, respectively. The  $t_i$  were  
 701 chosen such that the first (for *max*) or the last (for *sustained*) second after  
 702 the onset of the dark period is included.

703 *Off-, On-Detection index ( $I_{off}$ ,  $I_{on}$ ) and high frequency index (HFi):* For the  
 704 detection indices we used a Gaussian noise stimulus ( $(\mu, \sigma) = (0.5, 0.3)$ )  
 705 with 2 Hz and a length of 150 s. This stimulus was shown for 120 s before  
 706 the event to detect occurred with an amplitude of plus or minus four times  
 707 the standard deviation and a duration of 500 ms. The detection indices of the  
 708 simulation  $x$  were finally computed as

709  
 710 
$$I_{off}(x) = (\max(x_{[t_0, t_1]}) - \text{mean}(x_{[t_0, t_1]})) / \text{std}(x_{[t_0, t_1]}),$$
  
 711 
$$I_{on}(x) = \text{abs}(\min(x_{[t_0, t_1]}) - \text{mean}(x_{[t_0, t_1]})) / \text{std}(x_{[t_0, t_1]}),$$

712  
 713 with  $t_0 = 60$  s and  $t_1 = 150$  s.

714 For the HFi we used uniformly distributed noise of 100 s at 20 Hz and  
 715 computed the discretized power spectrum  $p$  of the simulation  $x$  with Welch's  
 716 method, and defined the HFi on the by the standard deviation normalized  
 717 data  $x$  as

718 
$$HFi(x) = \sum_{i=1}^n p_i(x) \cdot f_i,$$

719 with  $n$  such that  $f_n < 25$ Hz.

720 **Model.** We modelled the synaptic release by a cascade-like ribbon synapse  
 721 model (Fig. 4a) with three vesicle pools (reserve pool *RP*, intermediate pool  
 722 *IP* and readily releasable pool *RRP*) and changing rates which were  
 723 dependent on the occupancy of the pools (Baden et al., 2014; Sterling and  
 724 Matthews, 2005). In this model, the glutamate release  $e(t)$  was driven by the  
 725 intracellular calcium  $Ca(t)$ :

$$726 \quad e(t) = e_{max} \cdot f(Ca(t)) \cdot \frac{RRP(t)}{RRP_{max}}$$

727  
 728 with

$$729 \quad f(Ca) = \frac{1}{1 + \exp(-k \cdot (Ca - x_0))}.$$

730  
 731 As  $f(x_0) = 0.5$ , the parameter  $x_0$  specifies the operating point of the non-  
 732 linearity. It can be seen as an inverted baseline: the smaller  $x_0$  the less  
 733 additional calcium is needed to trigger a vesicle release. If we assume a fixed  
 734 calcium affinity for vesicle release, this implies an increased baseline level  
 735 in the synapse.

736 The changing rates  $r(t)$  (between *RP* and *IP*) and  $i(t)$  (between the *IP* and  
 737 *RRP*) were independent of calcium:  
 738

$$739 \quad r(t) = r_{max} \cdot \left(1 - \frac{IP(t)}{IP_{max}}\right) \cdot \frac{RP(t)}{RP_{max}}$$

$$740 \quad i(t) = i_{max} \cdot \left(1 - \frac{RRP(t)}{RRP_{max}}\right) \cdot \frac{IP(t)}{IP_{max}}$$

741  
 742 Additionally, the refilling  $d(t)$  of the reserve pool was modelled by a constant  
 743 factor of the available exocytosed vesicles  $Exo(t)$ :  
 744

$$745 \quad d(t) = d_{max} \cdot Exo(t)$$

746  
 747 Therefore, the number of vesicles in the pools changed as:  
 748

$$749 \quad \frac{dRP(t)}{dt} = d(t) - r(t)$$

$$750 \quad \frac{dIP(t)}{dt} = r(t) - i(t)$$

$$751 \quad \frac{dRRP(t)}{dt} = i(t) - e(t)$$

$$752 \quad \frac{dExo(t)}{dt} = e(t) - d(t).$$

753  
 754 In the original model in (Baden et al., 2014) there was also a non-linear  
 755 influence of calcium for  $i(t)$  in terms of  $\frac{Ca}{Ca+c}$ . But initial runs of the fitting  
 756 procedure resulted in  $c \approx 0$  which indicated no calcium dependency for the  
 757 changing rate  $i$  and we excluded this term in the presented model. Since the  
 758 endocytosis constant  $d_{max}$  and the size of the reserve pool *RP* did not affect

759 the output of the model, our fitting procedure was constrained to the  
760 remaining seven parameters: the changing rates ( $r_{max}$ ,  $i_{max}$ ,  $e_{max}$ ) the non-  
761 linearity parameters ( $k$  and  $x_0$ ), and the remaining pool sizes ( $IP$  and  $RRP$ ).  
762 We call these parameters  $\theta = (r_{max}, i_{max}, e_{max}, k, x_0, IP, RRP)$ . From the  
763 equation above it follows that the model is scale invariant: a scaling of the  
764 parameters (except the parameters for the non-linearity,  $x_0$  and  $k$ ) results in  
765 a scaled model output and thus only an arbitrary scale in vesicle units (v.u.)  
766 to the experimental traces can be fitted.

767 The described coupled ODE was solved with *scipy's* (version 1.5.1)  
768 implementation of the Bogacki–Shampine method (Bogacki and Shampine,  
769 1989), an explicit Runge-Kutta method of order 3 with adaptive step-sizes,  
770 where the maximal step size was set to the step size of the (calcium) input  
771 signal.

772  
773 **Simplified Model.** To reduce the parameter space to identify general rules  
774 or ribbon tuning (Fig. 6d-f, Fig. 7 and online tool) we fixed  $k$  to 10.2 (equal to  
775 the mean of the fitted parameters across zones) and additionally coupled the  
776 maximal changing rates to the pool sizes as follows:

777

$$\begin{aligned} 778 \quad r_{max} &= 0.2 \cdot IP_{max} \\ 779 \quad i_{max} &= 0.4 \cdot IP_{max} \\ 780 \quad e_{max} &= \tilde{e}_{max} \cdot RRP_{max} \end{aligned}$$

781 where  $\tilde{e}_{max}$  can take values between 0 and 1.

782 For the general rules of ribbon tuning (Fig. 6d-f, Fig. 7 and online tool) the  
783 calcium concentration evoked by a light stimulus  $s(t)$  is simulated as  
784 following:

$$785 \quad Ca(t) = \kappa_2 * \exp(\kappa_1 * s(t))$$

786 where  $\kappa_1$  is a biphasic kernel from (Baden et al., 2014) and  $\kappa_2$  is a double  
787 exponential kernel with fixed time constant  $\tau_{rise}$  (30 ms) and variable decay  
788 parameter  $\tau_{decay}$ .

789 **Parameter Inference.** For the inference of the model parameters, we  
790 iterated the following steps over several rounds: First we draw samples from  
791 a prior, evaluated the model and extracted summary statistics on which the  
792 loss was computed. Based on these loss values and the sampled  
793 parameters a mixture of density network (MDN) was trained and finally  
794 evaluated to get the posterior of this round which was used as the prior for  
795 the next round (Fig. 4b).

796 *Summary statistics and relevant loss*

797 A key ingredient in simulation-based Bayesian inference is to define problem  
798 and domain specific summary statistics to project the data to a low  
799 dimensional feature space. For our setting, we identified the following  
800 fourteen features  $x_i$ : baseline during adaption as well as period of UV-bright

801 stimulus, mean during UV-dark period as well as mean of the maximal  
802 release rates in this periods, maximal and minimal (as maximal value and  
803 25<sup>th</sup> percentile) amplitude during the first flash, maximal and minimal (as  
804 maximal value and 25<sup>th</sup> percentile) amplitude of the second peak, total  
805 number of released vesicles during first, second and the last activation.

806 To pay special attention to the decay after the initial UV-dark flash, which we  
807 found to be informative about the different pool sizes of the ribbon, we fitted  
808 an exponential decay to this period. We used the inferred time constant  $\tau$   
809 and the evaluation of the exponential function at the time point before the  
810 next light onset as additional features along with an extra penalty if an  
811 exponential rise instead of a decay was fitted.

812 To calculate the relevant loss  $R$  of a simulated trace  $e$  we normalized the  
813 features in each component with the mean and standard deviation of the  
814 recorded traces. We then took a weighted mean squared error of this  
815 normalized summary vector  $x$  to the normalized summary vector  $x_0$  of the  
816 recorded trace as the relevant loss:

$$817 \quad R(e) = \frac{1}{14} \sum_{i=1}^{14} w_i (x_{0,i} - x_i)^2.$$

818 The weights  $w_i$  were not systematically optimized, but within reasonable  
819 ranges the results were relatively insensitive to the exact values. We chose  
820  $w = (0.5, 0.5, 5, 1, 1, 1, 1, 1, 1, 1, 2, 1, 1, (0.01 \text{ for decay and } 10 \cdot (1 + \text{ceil}(\tau)) \text{ for rise}))$   
821 for the features in the order mentioned as above, where the last value is the  
822 extra penalty for the exponential rise instead of a decay.

### 823 *Prior distribution and parameter normalization*

824 The modes of the prior were chosen as  $(r, i, e, k, x_0, IP_{max}, RRP_{max}) = (2.5,$   
825  $2.5, 10, 14, 0.5, \approx 13.8, \approx 4.0)$ , but as the model was scale invariant, the  
826 absolute values are uninformative and only the relative values are of interest.  
827 For technical reasons we normalized the prior distributions such that the  
828 means of the uncorrelated multivariate normal distribution were 0.5 and the  
829 standard deviations were 0.2 in each dimension. For the IP and RRP pool  
830 sizes, we additionally exponentially scaled the sampled parameters, such  
831 that no negative values could occur.

832

### 833 *Parameter Inference*

834 We applied the Sequential Neural Posterior Estimation method described in  
835 (Lueckmann et al., 2017) (code available at  
836 <https://github.com/mackelab/delfi>) (also called SNPE-B) with some  
837 modifications which were also applied in (Oesterle et al., 2020; Yoshimatsu  
838 et al., 2020a). In brief, SNPE-B draws over several rounds samples  $\{\theta_i\}_{i \in I}$   
839 from a prior  $\tilde{p}(\theta)$  and evaluates the model for these parameters. For each  
840 evaluation  $e_i$  the relevant loss function  $x_i = R(e_i)$  is computed and a mixture  
841 density network (MDN)  $q_\phi(\theta, x)$  is trained on the data pairs  $\{(\theta_i, x_i)\}_{i \in I}$ . The  
842 posterior  $p(\theta|x_0)$  is then calculated as  $q_\phi(\theta|x = x_0)$  and used as a new  
843 prior  $\tilde{p}(\theta)$  in the next sampling round. Instead of  $x_0 = 0$  we calculated the



844 new prior  $\tilde{p}(\theta)$  in round  $n$  as  $q_{\phi}(\theta|x = \beta_n)$  where  $\beta_n$  is the 0.1<sup>th</sup> percentile  $\rho$   
845 of the relevant loss function of all samples. It turned out that this is an efficient  
846 way to get a more stable behavior of the MDN since it has not to extrapolate  
847 to unreached loss values but is converging nevertheless. This evaluation of  
848  $q_{\phi}(\theta|x = \beta_n)$  at  $\beta_n = \rho$  can be seen as the posterior over the parameters for  
849 the "best-possible" model evaluations. Testing for different percentiles in a  
850 reasonable range did not change the results. We took the same approach  
851 for setting an adaptive bandwidth for the kernel. As an additional post-hoc  
852 verification of the posteriors, we took as final posterior distributions the  
853 posterior of the round with the smallest median loss of its samples ("early  
854 stopping").

855

856 *Technical details*

857 We ran the inference algorithm over 5 rounds, with 300.000 samples per  
858 round. We chose three Gaussian components for the mixture of Gaussian  
859 distribution and a MDN with two hidden layers with 120 nodes each. In each  
860 round the network was trained for 800 epochs with a minibatch size of 1000.  
861 To let the MDN focus on regions of low relevant loss values, we used a  
862 combined half-uniform-half-Gaussian kernel which was constant up to the  
863 pseudo observation  $\beta_n$  and decayed then as a half Gaussian. The scale of  
864 this half-Gaussian part of the kernel was in each round chosen as the 25<sup>th</sup>-  
865 percentile of the relevant loss function.

866

867 **Sensitivity Analysis.** Sensitivity analysis was performed using *uncertainpy*  
868 (Tennøe et al., 2018) by using the *GaussianMixture* probability distribution  
869 class of *chaospy* (Feinberg and Langtangen, 2015). Since model evaluations  
870 are computationally cheap and could run in parallel, we took the (quasi-)  
871 Monte Carlo Method with 10e5 samples, resulting in 450.000 simulations.  
872 With *uncertainpy* we calculated the first order Sobol sensitivity index  $S_i$  which  
873 is defined as

874 
$$S_i = \frac{\mathbb{V}[\mathbb{E}[Y|\theta_i]]}{\mathbb{V}[Y]},$$

875 where  $\mathbb{E}$  and  $\mathbb{V}$  are the expected value and the variance, respectively.  $S_i$   
876 measures the direct effect each parameter has on the variance of the model  
877 output (Saltelli et al., 2008; Tennøe et al., 2018). It tells us the expected  
878 reduction in relative variance if we fix parameter  $\theta_i$ . The sum of the first-order  
879 Sobol indices cannot exceed one and is equal to one if no interactions are  
880 present (Glen and Isaacs, 2012; Tennøe et al., 2018). We also calculated  
881 the total-order indices which gives the sensitivity due to interactions of the  
882 parameters. But since already the sum of the first-order indices is almost one  
883 for our model, the total order indices look quite similar and we omit their  
884 analysis.

885 It is important to remark, that the Sobol indices are not a way to show how  
886 'important' parameters are. A parameter which is overbearingly influencing  
887 the model would in the limit of the posterior estimation accumulate the mass  
888 on one single point. But this means that for samples from the posterior this

889 parameter is not responsible for any variance of the model output and thus  
890 its Sobol index would be zero. The Sobol indices are therefore the result of  
891 a complex interplay of the model and the posterior estimation, but especially  
892 its temporal changes give us insight into the time dependent influence on the  
893 model output. However, the posteriors are an adequate probability  
894 distribution to calculate the Sobol indices, as they provide all parameter  
895 combinations which are in agreement with the experimental data and are  
896 more expressive as commonly used uniform distributions, where each  
897 marginal is simply defined as the mean  $\pm 10\%$  of the fitted parameters.

898 **Linear baseline model.** To evaluate the performance of the biophysical  
899 model, we compared it to a simple linear model. For this, we performed a  
900 regularized least square regression (ridge regression using *scikit-learn*,  
901 *version 0.23.1*, <https://scikit-learn.org>) to fit the calcium to glutamate  
902 response. In lack of a diverse enough dataset, we set the regularization  
903 coefficient alpha to 0.1 and allowed the model to include the data from the  
904 past 0.5 second to predict the next time point.

## 905 **Statistical Analysis**

### 906 *Vesicle Densities*

907 We used Generalized Additive Models (GAMs) for the comparison of the  
908 vesicle densities (Fig. 1g, Fig. S1). GAMs are an extension to generalized  
909 linear models by allowing linear predictors that depend on smooth functions  
910 of the underlying variables (Wood, 2017). We used the *mgcv*-package  
911 (version 1.8-33) in R on an Windows 10 workstation with default parameters,  
912 if not specified differently below. We modelled the dependence of the vesicle  
913 density as a smooth term dependent on the distance with 100 degrees of  
914 freedom and grouped by “zone”. We further used “zone” as additional  
915 predictive variable. The model explained ~65% of the deviance. Statistical  
916 significance for differences between the dependence on the vesicle density  
917 in the different retinal regions were obtained using the *plot\_diff* function of  
918 the *itsadug*-package for R (version 2.4) with a 95% confidence level.

### 919 *Hypothesis Testing*

920 For comparisons between regional properties (ribbon geometry (Fig. 1) and  
921 functional indices (Fig. 3)) we used two-sided shuffling tests with Bonferroni  
922 correction. Sample sizes and significant levels are stated in the figure  
923 captions.

## 924 REFERENCES

- 925 Baden T. 2021. Circuit-mechanisms for colour vision in zebrafish. *Curr Biol (in press)*.
- 926 Baden T, Euler T, Berens P. 2020. Understanding the retinal basis of vision across species. *Nat Rev*  
927 *Neurosci* **21**:5–20. doi:10.1038/s41583-019-0242-1
- 928 Baden T, Euler T, Weckström M, Lagnado L. 2013a. Spikes and ribbon synapses in early vision. *Trends*  
929 *Neurosci* **36**:480–8. doi:10.1016/j.tins.2013.04.006
- 930 Baden T, Nikolaev A, Esposti F, Dreosti E, Odermatt B, Lagnado L. 2014. A Synaptic Mechanism for  
931 Temporal Filtering of Visual Signals. *PLoS Biol* **12**:e1001972. doi:10.1371/journal.pbio.1001972
- 932 Baden T, Schubert T, Chang L Le, Wei T, Zaichuk M, Wissinger B, Euler T, Zaichuk M, Wissinger B,  
933 Euler T, Zaichuk M, Wissinger B, Euler T. 2013b. A tale of two retinal domains: near-optimal  
934 sampling of achromatic contrasts in natural scenes through asymmetric photoreceptor distribution.  
935 *Neuron* **80**:1206–1217. doi:10.1016/j.neuron.2013.09.030
- 936 Beaumont V, Llobet A, Lagnado L. 2005. Expansion of calcium microdomains regulates fast exocytosis  
937 at a ribbon synapse. *Proc Natl Acad Sci U S A* **102**:10700–5. doi:10.1073/pnas.0501961102
- 938 Bellono NW, Leitch DB, Julius D. 2018. Molecular tuning of electroreception in sharks and skates.  
939 *Nature* **558**:122–126. doi:10.1038/s41586-018-0160-9
- 940 Bogacki P, Shampine LF. 1989. A 3(2) pair of Runge - Kutta formulas. *Appl Math Lett*. doi:10.1016/0893-  
941 9659(89)90079-7
- 942 Cardona A, Saalfeld S, Schindelin J, Arganda-Carreras I, Preibisch S, Longair M, Tomancak P,  
943 Hartenstein V, Douglas RJ. 2012. TrakEM2 Software for Neural Circuit Reconstruction. *PLoS One*  
944 **7**:e38011. doi:10.1371/journal.pone.0038011
- 945 Chen T-W, Wardill TJ, Sun Y, Pulver SR, Renninger SL, Baohan A, Schreiter ER, Kerr RA, Orger MB,  
946 Jayaraman V, Looger LL, Svoboda K, Kim DS. 2013. Ultrasensitive fluorescent proteins for  
947 imaging neuronal activity. *Nature* **499**:295–300. doi:10.1038/nature12354
- 948 Dana H, Mohar B, Sun Y, Narayan S, Gordus A, Haseeman JP, Tsegaye G, Holt GT, Hu A, Walpita D,  
949 Patel R, Macklin JJ, Bargmann CI, Ahrens MB, Schreiter ER, Jayaraman V, Looger LL, Svoboda  
950 K, Kim DS. 2016. Sensitive red protein calcium indicators for imaging neural activity. *Elife* **5**.  
951 doi:10.7554/eLife.12727
- 952 DeVries SH, Li W, Saszik S. 2006. Parallel processing in two transmitter microenvironments at the cone  
953 photoreceptor synapse. *Neuron* **50**:735–48. doi:10.1016/j.neuron.2006.04.034
- 954 Feinberg J, Langtangen HP. 2015. Chaospy: An open source tool for designing methods of uncertainty  
955 quantification. *J Comput Sci*. doi:10.1016/j.jocs.2015.08.008
- 956 Franceschini N, Hardie R, Ribi W, Kirschfeld K. 1981. Sexual dimorphism in a photoreceptor. *Nature*.  
957 doi:10.1038/291241a0
- 958 Glen G, Isaacs K. 2012. Estimating Sobol sensitivity indices using correlations. *Environ Model Softw*.  
959 doi:10.1016/j.envsoft.2012.03.014
- 960 Gonçalves PJ, Lueckmann JM, Deistler M, Nonnenmacher M, Öcal K, Bassetto G, Chintaluri C,  
961 Podlaski WF, Haddad SA, Vogels TP, Greenberg DS, Macke JH. 2020. Training deep neural  
962 density estimators to identify mechanistic models of neural dynamics. *Elife*.  
963 doi:10.7554/ELIFE.56261
- 964 Gutenkunst RN, Waterfall JJ, Casey FP, Brown KS, Myers CR, Sethna JP. 2007. Universally sloppy  
965 parameter sensitivities in systems biology models. *PLoS Comput Biol*.

- 966 doi:10.1371/journal.pcbi.0030189
- 967 Hays C, Sladek A, Field G, Thoreson W. 2021. Properties of multi-vesicular release from rod  
968 photoreceptors support transmission of single photon responses. *bioRxiv* 2021.02.01.429179.  
969 doi:10.1101/2021.02.01.429179
- 970 Holler S, Köstinger G, Martin KAC, Schuhknecht GFP, Stratford KJ. 2021. Structure and function of a  
971 neocortical synapse. *Nature* 1–6. doi:10.1038/s41586-020-03134-2
- 972 Jackman SL, Choi S-Y, Thoreson WB, Rabl K, Bartoletti TM, Kramer RH. 2009. Role of the synaptic  
973 ribbon in transmitting the cone light response. *Nat Neurosci* **12**:303–10. doi:10.1038/nn.2267
- 974 Jarsky T, Tian M, Singer JH. 2010. Nanodomain control of exocytosis is responsible for the signaling  
975 capability of a retinal ribbon synapse. *J Neurosci* **30**:11885–95. doi:10.1523/JNEUROSCI.1415-  
976 10.2010
- 977 Kwan KM, Fujimoto E, Grabher C, Mangum BD, Hardy ME, Campbell DS, Parant JM, Yost HJ, Kanki  
978 JP, Chien C-B. 2007. The Tol2kit: A multisite gateway-based construction kit for Tol2 transposon  
979 transgenesis constructs. *Dev Dyn* **236**:3088–3099. doi:10.1002/dvdy.21343
- 980 Land MF, Nilsson D-E. 2012. *Animal Eyes*. Oxford University Press.  
981 doi:10.1093/acprof:oso/9780199581139.001.0001
- 982 Lewis A, Williams P, Lawrence O, Wong ROL, Brockerhoff SE. 2010. Wild-type cone photoreceptors  
983 persist despite neighboring mutant cone degeneration. *J Neurosci*.  
984 doi:10.1523/JNEUROSCI.5019-09.2010
- 985 Lueckmann JM, Gonçalves PJ, Bassetto G, Öcal K, Nonnenmacher M, Mackey JH. 2017. Flexible  
986 statistical inference for mechanistic models of neural dynamics *Advances in Neural Information*  
987 *Processing Systems*.
- 988 Moser T, Grabner CP, Schmitz F. 2019. Sensory processing at ribbon synapses in the retina and the  
989 cochlea. *Physiol Rev* physrev.00026.2018. doi:10.1152/physrev.00026.2018
- 990 Oesterle J, Behrens C, Schröder C, Herrmann T, Euler T, Franke K, Smith RG, Zeck G, Berens P. 2020.  
991 Bayesian inference for biophysical neuron models enables stimulus optimization for retinal  
992 neuroprosthetics. *bioRxiv* **9**:1–38. doi:doi: <https://doi.org/10.1101/2020.01.08.898759>
- 993 Özçete ÖD, Moser T. 2021. A sensory cell diversifies its output by varying Ca<sup>2+</sup> influx-release coupling  
994 among active zones. *EMBO J* **40**:e106010. doi:10.15252/emj.2020106010
- 995 Regus-Leidig H, Brandstätter JH. 2012. Structure and function of a complex sensory synapse. *Acta*  
996 *Physiol*. doi:10.1111/j.1748-1716.2011.02355.x
- 997 Saltelli A, Ratto M, Andres T, Campolongo F, Cariboni J, Gatelli D, Saisana M, Tarantola S. 2008.  
998 Global Sensitivity Analysis. The Primer, Global Sensitivity Analysis. The Primer.  
999 doi:10.1002/9780470725184
- 1000 Schnapf JL, Baylor DA. 1987. How photoreceptor cells respond to light. *Sci Am* **256**:40–7.
- 1001 Schröder C, James B, Lagnado L, Berens P. 2019. Approximate Bayesian inference for a mechanistic  
1002 model of vesicle release at a ribbon synapse *Advances in Neural Information Processing Systems*.  
1003 bioRxiv. p. 669218. doi:10.1101/669218
- 1004 Sinha R, Hoon M, Baudin J, Okawa H, Wong ROL, Rieke F. 2017. Cellular and Circuit Mechanisms  
1005 Shaping the Perceptual Properties of the Primate Fovea. *Cell* **168**:413-426.e12.  
1006 doi:10.1016/j.cell.2017.01.005
- 1007 Sterling P, Matthews G. 2005. Structure and function of ribbon synapses. *Trends Neurosci* **28**:20–9.

- 1008 doi:10.1016/j.tins.2004.11.009
- 1009 Szatko KP, Korympidou MM, Ran Y, Berens P, Dalkara D, Schubert T, Euler T, Franke K. 2019. Neural  
1010 circuits in the mouse retina support color vision in the upper visual field. *bioRxiv* 745539.  
1011 doi:10.1101/745539
- 1012 Tennøe S, Hanes G, Einevoll GT. 2018. Uncertainpy: A Python Toolbox for Uncertainty Quantification  
1013 and Sensitivity Analysis in Computational Neuroscience. *Front Neuroinform*.  
1014 doi:10.3389/fninf.2018.00049
- 1015 Thoreson WB, Rabl K, Townes-Anderson E, Heidelberger R. 2004. A highly Ca<sup>2+</sup>-sensitive pool of  
1016 vesicles contributes to linearity at the rod photoreceptor ribbon synapse. *Neuron* **42**:595–605.  
1017 doi:10.1016/S0896-6273(04)00254-5
- 1018 Wichmann C, Moser T. 2015. Relating structure and function of inner hair cell ribbon synapses. *Cell*  
1019 *Tissue Res* **361**:95–114. doi:10.1007/s00441-014-2102-7
- 1020 Wood SN. 2017. Generalized additive models: an introduction with R. CRC press.
- 1021 Yoshimatsu T, Bartel P, Schröder C, Janiak FK, St-Pierre F, Berens P, Baden T. 2020a. Ancestral  
1022 circuits for vertebrate colour vision emerge at the first retinal synapse. *bioRxiv* 2020.10.26.356089.  
1023 doi:<https://doi.org/10.1101/2020.10.26.356089>
- 1024 Yoshimatsu T, D'Orazi FD, Gamlin CR, Suzuki SC, Suli A, Kimelman D, Raible DW, Wong RO. 2016.  
1025 Presynaptic partner selection during retinal circuit reassembly varies with timing of neuronal  
1026 regeneration in vivo. *Nat Commun* **7**:10590. doi:10.1038/ncomms10590
- 1027 Yoshimatsu T, Schröder C, Nevala NE, Berens P, Baden T. 2020b. Fovea-like Photoreceptor  
1028 Specializations Underlie Single UV Cone Driven Prey-Capture Behavior in Zebrafish. *Neuron*  
1029 **107**:320-337.e6. doi:10.1016/j.neuron.2020.04.021
- 1030 Zimmermann MJY, Maia Chagas A, Bartel P, Pop S, Prieto-Godino LL, Baden T. 2020. LED Zappelin':  
1031 An open source LED controller for arbitrary spectrum visual stimulation and optogenetics during  
1032 2-photon imaging. *HardwareX*. doi:10.1016/j.ohx.2020.e00127
- 1033 Zimmermann MJY, Nevala NE, Yoshimatsu T, Osorio D, Nilsson D-E, Berens P, Baden T. 2018.  
1034 Zebrafish Differentially Process Color across Visual Space to Match Natural Scenes. *Curr Biol*  
1035 **28**:2018-2032.e5. doi:10.1016/j.cub.2018.04.075
- 1036
